1 **Time-of-day defines the efficacy of NAD<sup>+</sup> to treat diet-induced metabolic disease by**  
2 **adjusting oscillations of the hepatic circadian clock**

3

4 Escalante-Covarrubias, Q<sup>1</sup>; Mendoza-Viveros, L<sup>1,2</sup>; González-Suárez, M<sup>1</sup>; Becerril-Pérez, F<sup>1</sup>;  
5 Pacheco-Bernal, I<sup>1</sup>; Carreño-Vázquez, E<sup>2</sup>; Mass-Sánchez, P<sup>1</sup>; Bustamante-Zepeda, M<sup>1</sup>;  
6 Orozco-Solís, R<sup>2</sup>; Aguilar-Arnal, L<sup>1\*</sup>.

7 <sup>1</sup> Departamento de Biología Celular y Fisiología, Instituto de Investigaciones Biomédicas,  
8 Universidad Nacional Autónoma de México, 04510 Mexico City, Mexico

9 <sup>2</sup> Laboratorio de Cronobiología y Metabolismo, Instituto Nacional de Medicina Genómica,  
10 14610 Mexico City, Mexico

11

12 \* To whom correspondence should be addressed: [loreaguilararnal@iibiomedicas.unam.mx](mailto:loreaguilararnal@iibiomedicas.unam.mx)

13

14 **SUMMARY**

15 The circadian clock is a time-tracking endogenous system which anticipates and coordinates  
16 adaptation to daily environmental fluctuations. Circadian misalignment leads to obesity, which  
17 is accompanied by reduced levels of the clock-controlled metabolite NAD<sup>+</sup>. Concomitantly,  
18 increasing NAD<sup>+</sup> levels is emerging as a therapy for diet-induced obesity and type 2 diabetes;  
19 however, the impact of daily fluctuations of NAD<sup>+</sup> on these therapies remains unknown. Here,  
20 we demonstrate that time-of-day determines the efficacy of NAD<sup>+</sup> as a therapy for diet-induced  
21 metabolic disease in mice. Restoring regular NAD<sup>+</sup> oscillations at the onset of the active phase  
22 ameliorates metabolic markers of disease such as body weight and glucose and insulin  
23 tolerance, and restores hepatic gene expression related to inflammatory response and lipid  
24 metabolism. However, the same treatment designed to increase NAD<sup>+</sup> at the onset of the rest  
25 phase severely compromises these beneficial responses. Notably, hepatic nutrient-sensing  
26 mTOR, AMPK or AKT signaling, became rhythmic specifically in obese mice treated just  
27 before the active phase. Remarkably, NAD<sup>+</sup> at the onset of the rest phase was accompanied  
28 by uncoupled oscillations between the SCN and the hepatic clock, which were phase inverted  
29 in the liver, while keeping behavioral rhythms largely intact. These findings demonstrate that  
30 the time of day determines the beneficial effects of NAD<sup>+</sup>-based therapies and pave the way  
31 for the basic strategy of a chronobiology-based therapeutic approach.

32

33 **Key words:** Circadian rhythms, obesity, NAD<sup>+</sup>, chronotherapy, fatty acid oxidation, fatty liver  
34 disease, glucose homeostasis, transcriptomics.

35

## 36 INTRODUCTION

37 In the last few decades, the prevalence of obesity has become epidemic through the world and  
38 is a major risk factor for type 2 diabetes (T2D)<sup>1</sup>. The main cause appears as combined  
39 inappropriate nutrition and sedentary lifestyles. Overweight, insulin resistance,  $\beta$ -cell  
40 dysfunction, increased circulating glucose and lipids and non-alcoholic fatty liver disease  
41 (NAFLD) characterize the pathophysiology of T2D<sup>2</sup>. Countless research efforts have explored  
42 pharmacological treatments for T2D and associated pathologies leading to promising  
43 compounds, which together with lifestyle interventions constitute first-line treatments<sup>3</sup>. During  
44 the last few years, the circadian system has been increasingly recognized as a key actor for  
45 development and treatment of diet-induced metabolic dysfunction. Yet, circadian rhythms in  
46 the clinical practice remain largely overlooked and time-of-day is hardly considered in  
47 treatment decisions<sup>4-8</sup>.

48 Circadian rhythms are evolutionary conserved 24-hour cycles in physiology dictated by an  
49 intrinsic circadian clock. In mammals, the suprachiasmatic nucleus (SCN), a master  
50 timekeeper in the hypothalamus, receives photic cues from the retina to align internal and  
51 external time. The SCN distally synchronizes ancillary oscillators in peripheral tissues.  
52 Importantly, certain cues such as nutritional inputs effectively synchronize peripheral clocks<sup>9</sup>.  
53 Aligned synchrony between all body clocks maintains homeostasis and health, for example, by  
54 adjusting metabolic performance to daily environmental fluctuations. Conversely, persistent  
55 circadian misalignment is a cause of severe diseases, including obesity and metabolic  
56 syndrome, T2D or cardiovascular disease, amongst others<sup>10-12</sup>. At the molecular level, the  
57 circadian machinery is expressed in almost all cell types and consists of transcriptional-  
58 translational autoregulatory feedback loops. The positive loop is driven by the CLOCK:BMAL1

59 transcriptional activator, which rhythmically binds to E-box genomic elements, thereby  
60 activating transcription of many genes including the circadian repressors, Period (*Per1-3*) and  
61 Cryptochrome (*Cry1-2*). PER:CRY complexes directly repress CLOCK:BMAL1 leading to  
62 transcriptional silencing. A number of interlocked regulatory loops, such as the one governed  
63 by RORs/REV-ERB $\alpha$  to regulate *Bmal1* expression, intertwine to confer complexity,  
64 redundancy and robustness to circadian rhythms<sup>13</sup>. Consequently, a set of clock-controlled  
65 genes (CCGs) ranging from 5-25% depending on the tissue or cell type, display transcriptional  
66 circadian rhythms<sup>14</sup>. Notably, rhythmic transcripts are functionally related, including rate-  
67 limiting enzymes, hence providing means to adjust the pace of many metabolic pathways  
68 around the day and driving rhythms in the tissue metabolome<sup>15-18</sup>. A paradigmatic example is  
69 illustrated by daily rhythms in nicotinamide adenine dinucleotide (NAD<sup>+</sup>) bioavailability,  
70 imposed by circadian oscillations in the clock-controlled gene *Nampt*, the rate limiting enzyme  
71 for the NAM salvage pathway to NAD<sup>+</sup><sup>19,20</sup>. Several lines of evidence demonstrate that the  
72 molecular clock and NAD<sup>+</sup> oscillations sustain mitochondrial function and bioenergetics,  
73 manifested in daily rhythms in respiration, fatty acid oxidation or nutrient utilization<sup>21-25</sup>.  
74 Indeed, it is considered that clock-controlled NAD<sup>+</sup> biosynthesis occupies a fundamental  
75 position connecting circadian metabolic pathways<sup>26-28</sup>.

76 NAD<sup>+</sup> and its phosphorylated and reduced forms NADH, NADP<sup>+</sup> and NADPH, are coenzymes  
77 for hydride transfer enzymes, crucial to biological redox reactions. NAD<sup>+</sup>/NADH ratio is a basic  
78 determinant of the rate of catabolism and energy production<sup>29,30</sup>. In fed state or nutrient  
79 overload NAD<sup>+</sup>/NADH ratio falls, and a prolonged redox imbalance potentially leads to  
80 metabolic pathologies, such as diabetes<sup>31</sup>. Along these lines, extensive research demonstrates  
81 that NAD<sup>+</sup> levels significantly decline in metabolic tissues of obese mice and humans<sup>32-37</sup>.

82 NAD<sup>+</sup> decay itself may contribute to metabolic dysfunction by distinct mechanisms, including  
83 increased oxidative stress and ROS production, disbalance in the oxidative-reductive capacity,  
84 disrupted Ca<sup>2+</sup> homeostasis, or reduced activity of sirtuins<sup>38,39</sup>; a class of deacetylase enzymes  
85 using NAD<sup>+</sup> as cofactor and known to influence mitochondrial function and metabolism. In  
86 recent years, NAD<sup>+</sup> has emerged as a target for the treatment of metabolic diseases, as  
87 boosting endogenous NAD<sup>+</sup> levels has been proven effective against diet-induced metabolic  
88 pathologies, including insulin resistance, hyperglycemia, hypertriglyceridemia and  
89 NAFLD<sup>32,33,35,36,40-45</sup>. All these studies aim to increase NAD<sup>+</sup> levels either genetically or  
90 pharmacologically, yet they mostly overlook the circadian trait of NAD<sup>+</sup> bioavailability.  
91 Consequently, the implications of circadian rhythms in the function and effectiveness of NAD<sup>+</sup>  
92 boosters as a therapy for diet-induced metabolic dysfunction remain largely obscure.

93 In this work, we aimed to characterize the metabolic consequences of rhythms in NAD<sup>+</sup> levels.  
94 To approach this question, we used a mouse model of diet-induced obesity (DIO), which is  
95 known to present decreased, non-rhythmic levels of NAD<sup>+</sup><sup>15-17</sup>, and pharmacologically  
96 recovered daily rhythms of NAD<sup>+</sup> with a peak at the onset of the active phase. To do so, we  
97 used a daily timed intraperitoneal (IP) injection with NAD<sup>+</sup> itself at ZT11. We show that obese  
98 mice with enforced NAD<sup>+</sup> oscillations improved metabolic health, significantly lost weight, and  
99 corrected NAFLD. Our analyses revealed that hepatic transcriptional signatures of  
100 inflammation disappeared in these mice. Indeed, hepatic signaling involving AMPK, AKT,  
101 mTOR was rewired after restoring rhythmic NAD<sup>+</sup> in obese mice, providing increased insulin  
102 sensitivity during the active period. Together, we demonstrated that a single daily injection with  
103 NAD<sup>+</sup> treats the pathophysiology of diet-induced obesity, with comparable efficiency to NAD<sup>+</sup>  
104 precursors. Remarkably, these metabolic and molecular improvements were not recapitulated

105 by obese mice with antiphase increase of NAD<sup>+</sup>, at the onset of the rest phase, which showed  
106 only mild recovery of metabolic health. Further analyses demonstrated that lipid oxidative  
107 pathways and the molecular clock are central mediators for phase-dependent, differential  
108 effects of NAD<sup>+</sup>. Particularly, NAD<sup>+</sup> provided at the onset of the rest phase uncoupled  
109 oscillations between central and peripheral clocks, while food intake remained rhythmic. These  
110 findings reveal that timed NAD<sup>+</sup> supply can shape the oscillatory phase of the hepatic  
111 molecular clock *in vivo* and expose a previously unappreciated time-dependent effect of NAD<sup>+</sup>  
112 as a treatment for metabolic dysfunction, paving the way for chronotherapy and personalized  
113 medicine.

114

## 115 **RESULTS**

### 116 **A timed treatment with NAD<sup>+</sup> reverses the metabolic phenotype of diet-induced obesity.**

117 To understand whether daily NAD<sup>+</sup> administration improves metabolic fitness in obesity, we  
118 used a mouse model of diet-induced obesity (DIO) where instead of increasing NAD<sup>+</sup> by  
119 chronic supplementation with metabolic precursors, we directly supplied the metabolite itself in  
120 a daily single IP injection scheduled at ZT11, corresponding to an hour before the normal  
121 circadian rise of hepatic NAD<sup>+</sup> <sup>16,17,21,27,46</sup>. Hence, after 8 weeks of high-fat diet (HFD) feeding,  
122 mice were treated for 22 days with saline solution (HF group) or 50 mg/Kg of NAD<sup>+</sup> (HFN  
123 group, Figure S1A, see Methods section), at ZT11 (Figure 1A). Mice fed a chow diet were  
124 included as a control (CD group).

125 At week 8 on HFD, mice displayed expected increase in body weight which was accompanied  
126 by significantly higher caloric intake during both light and dark periods <sup>47</sup> (Figure 1B, S1B, S1C,

127 S1D). Notably, after 14 days of NAD<sup>+</sup> chronotherapy, a significant decrease in total body  
128 weight was observed in obese treated mice (HFN) with respect to their obese non treated  
129 littermates (HF), which was sustained after 22 days (Figure 1B;  $P < 0.05$ , Two-way ANOVA,  
130 Tukey post-test). At the end of the treatment, hepatic NAD<sup>+</sup> content was measured by HPLC,  
131 showing the expected oscillation with a peak at ~ZT12 in control mice (CD, Figure 1C) which is  
132 mostly disrupted in HFD fed mice (HF, Figure 1C, S1E)<sup>16,21,36,46</sup>. Importantly, in the HFN group,  
133 the acrophase of NAD<sup>+</sup> was restored to ZT12 (HFN, Figure 1C, S1E), hence daily rhythms in  
134 hepatic NAD<sup>+</sup> content was reinstated in obese mice (Figure S1D;  $P < 0,001$ , *F*-test performed  
135 with CircWave).

136 We sought to assess physiological indicators of metabolic health and found that circulating  
137 insulin levels were much lower in the HFN group when compared to the HF group, with a major  
138 effect during the early active phase (Figure 1D, ZT12-18,  $P < 0,001$  Two-way ANOVA, Tukey  
139 post-test) and a six-hour phase delay in the oscillatory pattern (Figure S1F). Indeed, circulating  
140 insulin in HFN mice appeared largely comparable to their control littermates. Overall, we didn't  
141 find major differences in body temperature between treated and untreated obese mice,  
142 suggesting that circadian-controlled thermogenic processes<sup>48</sup> are probably not involved in the  
143 metabolic benefits observed upon restoring NAD<sup>+</sup> oscillations (Figure S1 G-J).

144 It has been extensively demonstrated that glucose tolerance and insulin sensitivity follow daily  
145 rhythms imposed by the circadian system<sup>49</sup>, hence we evaluated them at two different time  
146 points, ZT4 and ZT16. As expected, before NAD<sup>+</sup> treatment, HFD fed mice showed impaired  
147 glucose tolerance at both ZT (Figure S1K, S1L). Remarkably, after 10 days, restoring NAD<sup>+</sup>  
148 oscillations in obese mice significantly ameliorated glucose tolerance, specifically at ZT16  
149 (Figure 1E, 1F, AUC HF vs HFN at day 10:  $P = 0,0021$ , one-way ANOVA, Tukey post-test).

150 After 20 days of treatment, this improvement was also apparent at ZT4 (Figure 1E, AUC HF vs  
151 HFN at day 20:  $P < 0,01$ , one-way ANOVA, Tukey post-test). As both insulin and glucose levels  
152 were lower in NAD<sup>+</sup> treated mice, insulin sensitization might occur. Accordingly, glucose  
153 clearance upon insulin IP injection was largely enhanced by NAD<sup>+</sup> chronotherapy (Figure 1G,  
154 1H, S1M, S1N). Notably, this effect was already evident in the HFN group after 10 days of  
155 treatment independently of the time when measurements were performed (Figure 1G, 1H.  
156 AUC HF vs HFN at day 10:  $P < 0,001$ , one-way ANOVA, Tukey post-test). Interestingly, NAD<sup>+</sup>  
157 treatment at ZT11 promoted a slight, albeit not significant, improvement in insulin tolerance  
158 respect to control lean mice when tested at ZT16 (Figure 1H). These results demonstrate that  
159 a chronotherapy with NAD<sup>+</sup> injected just before starting the active phase improves glucose  
160 tolerance by increasing insulin sensitivity in DIO mice. Collectively, the restitution of NAD<sup>+</sup>  
161 bioavailability at ZT12 recovers its basal hepatic oscillation and reverses the metabolic  
162 syndrome associated to diet-induced obesity.

163 Histological staining with Oil-Red-O (ORO) was used to semi-quantitatively assess hepatic  
164 steatosis (Figure 2A), revealing that obese mice treated with NAD<sup>+</sup> significantly decreased  
165 hepatic neutral lipid content (Figure 2B, 2C, One-way ANOVA, Tukey's posttest). Furthermore,  
166 a quantitative assay specific for hepatic triglycerides, the major form of fatty acids storage,  
167 revealed that these were globally reduced in obese mice after restoring hepatic NAD<sup>+</sup>  
168 oscillations (Figure 2D, Two-way ANOVA, Tukey's posttest). Importantly, the NAD<sup>+</sup> treatment  
169 recovered their oscillatory pattern which is generally disrupted in obese mice <sup>16</sup> (Figure 2D,  
170 S2). Additionally, this timed NAD<sup>+</sup> therapy reduced the accumulation of carbonylated proteins  
171 in liver lysates to normal levels (Figure 2E), and augmented mitochondrial biogenesis (Figure  
172 2F). Together, these results indicated that increasing hepatic NAD<sup>+</sup> levels at ~ZT12 recovers



173 glucose homeostasis and successfully restrains liver pathology and oxidative stress of HFD-  
174 fed mice.

175 At the molecular level, the master regulator of lipid metabolism PPAR $\gamma$  protein<sup>50</sup> was  
176 overexpressed across the day in the livers from HFD-fed mice, while those treated with NAD<sup>+</sup>  
177 showed markedly reduced PPAR $\gamma$  levels (Figure 2G). A similar trend was evidenced for the  
178 transcription factor CEBP $\alpha$ , a known positive regulator of *Ppar $\gamma$*  gene expression and  
179 adipogenesis<sup>51,52</sup> (Figure 2G), further reinforcing the notion that a gene expression program  
180 involving lipid metabolism might be modified in NAD<sup>+</sup> treated mice.

### 181 **Extensive transcriptional reorganization driven by timed NAD<sup>+</sup> treatment.**

182 To address the extent of the transcriptional rewiring in the liver of NAD<sup>+</sup>-treated obese mice,  
183 we performed a transcriptomic analysis at light (ZT6) and dark (ZT18) phases in mouse livers  
184 from CD, HF and HFN groups. 76 common genes were differentially expressed (DE) between  
185 day and night in all groups (Figure 3A, Table S1), with comparable expression levels. Amongst  
186 these, a number of transcripts related to circadian control were apparent, including *Clock*, *Arntl*  
187 (*Bmal1*), *Cry1*, *Nr1d2* (*Rev-Erb $\beta$* ), *Rorc*, *Tef*, *Nfil3* or *Ciart* (Figure 3A, Table S1), suggesting  
188 that circadian rhythms were mostly preserved by the NAD<sup>+</sup> treatment at ZT11. Accordingly,  
189 rhythms in the core clock proteins BMAL1, CRY1, PER2 and REV-ERB $\alpha$  were overall  
190 sustained in the HFN group (Figure 3B, 3C). Interestingly, a significant reduction in CRY1  
191 protein levels at ZT12 was observed in the HFN group compared to the HF (Figure 3B, 3C).

192 An extensive circadian transcriptional reprogramming is induced by high fat diet in the liver<sup>16,53</sup>,  
193 hereafter we identified 524 day-to-night DE transcripts in CD mice, 1684 in HF mice and 599 in  
194 the HFN mice (Figure 3D, >1,25 fold-change,  $P < 0.05$ ). Out of these, 322 transcripts were

195 exclusively fluctuating in the CD group, 1327 fluctuated solely in the HF, interestingly, 306  
196 newly fluctuating transcripts appeared in the HFN group (Figure 3D, 3E, Table S1). Functional  
197 analyses revealed that indeed, many of these DE genes participated in shared biological  
198 processes including transport, metabolic processes and response to oxygen (Figure 3F, Table  
199 S1). As expected, day-to-night transitions in gene expression were more evident for genes  
200 implicated in lipid metabolism in HFD-fed mice independently of NAD<sup>+</sup> treatment (Figure 3G,  
201 Table S1). Remarkably, a set of genes functionally related to immune system processes  
202 appeared significantly enriched solely in the HF mice (Figure 3G, Table S1). Interestingly,  
203 timed NAD<sup>+</sup> supply imposed new and specific day-to-night transcriptional fluctuations in genes  
204 functionally related to response to stress and starvation (Figure 3G, Table S1). Hence, we  
205 reasoned that a time-of-day specific transcriptional response to NAD<sup>+</sup> might be responsible for  
206 the beneficial effects of rhythmic restitution of this metabolite.

207 To further dissect the expression program imposed by NAD<sup>+</sup>, we identified DE genes between  
208 groups, examined specifically at day (ZT6) or night (ZT18). At ZT6, 724 hepatic transcripts  
209 were significantly DE between CD and HF mice, while 936 transcripts varied when comparing  
210 HF and HFN groups, with 182 (12%) overlapping transcripts (Figure 4A, Table S2). At ZT18,  
211 1731 genes were DE in livers from CD and HF mice, and 698 were DE between HF and HFN  
212 mice, appearing 118 (5%) common transcripts (Figure 4A, Table S2). Interestingly, most of  
213 these DE shared transcripts recovered their expression in the obese NAD<sup>+</sup> treated (HFN) mice  
214 to control conditions (Figure 4B). Common DE genes between CD-HF and HF-HFN  
215 comparisons at ZT6 were specifically enriched for biological processes related to regulation of  
216 the immune response, including both innate and adaptive immune system pathways (Figure  
217 4C, Table S2). Furthermore, a direct assessment for distinctive gene sets between HF and

218 HFN groups at ZT6 using GSEA<sup>54</sup> (Gene Set Enrichment Analysis) showed that IL6-JAK-  
219 STAT3 and TGF $\beta$  signaling were the highest enriched hallmarks (Figure S3A). Indeed, timed  
220 NAD<sup>+</sup> treatment in obese mice suppressed the hepatic expression of inflammatory markers  
221 including *Stat3*, *Stat6*, *Tgfb1*, *Il1r1*, *Il6st*, *Tnfrsf1a*, *Tnfrsf1b*, *Smad3* or *Smad6* (Figure S3B).  
222 This supports the notion that timed NAD<sup>+</sup> treatment just before the onset of the active phase in  
223 obese mice abolishes the inflammatory environment associated with insulin resistance in  
224 NAFLD<sup>55,56</sup> specifically during their resting period. Accordingly, at ZT18, genes recovered to  
225 normal conditions by NAD<sup>+</sup> appeared mostly enriched for Lipid Metabolic Processes,  
226 particularly fatty acid biosynthesis and storage (*Plin2*, *Abhd5*, *Acsm1*, *Hsd17b12*, *Chka*)  
227 (Figure 4D, Table S2). Furthermore, a GSEA comparing HF and HFN groups at ZT18 revealed  
228 highest enrichment in the hallmarks Cholesterol Homeostasis and MTORC1 Signaling (Figure  
229 S3C), with significant downregulation of transcripts coding for major regulatory proteins and  
230 rate-limiting enzymes triggered by *de novo* NAD<sup>+</sup> oscillations (Figure S3D; Cholesterol  
231 Homeostasis: *Hmgcr*, *Hmgcs1*, *Sqle*, *Acss2*, *Lss* or *Stard4*; MTORC1 signaling: *Acaca*, *Acly*,  
232 *Me1*, *Adipor2*, *Psm3*, *Psm4*, *Psm14* or *Psmc6*). As shown, these hepatic expression  
233 changes at ZT18 were accompanied by improvement of hyperlipidemia and fatty liver traits  
234 after restoring NAD<sup>+</sup> oscillations in obese mice (Figure 2A-D). Pathway analyses revealed  
235 transcriptional mechanisms restituted by NAD<sup>+</sup>, with significant enrichment of NF $\kappa$ B, HIF1 and  
236 HNF3 transcriptional networks (Figure 4D); and *de novo* motif discovery in the promoters of  
237 genes whose expression appeared dysregulated only in the HF group identified strong  
238 similarities to NF $\kappa$ B-p65/RELA and FOXA1/FOXA2 (HNF $\alpha$ /HNF3 $\beta$ ) binding sites (Figure 4E).  
239 Accordingly, out of 83 transcripts recovered by NAD<sup>+</sup> at ZT18, 11 (13%) are previously  
240 described direct targets of FOXA2<sup>57</sup> (Figure S3E); interestingly, FOXA2 is a key regulator of

241 lipid metabolism which becomes dysregulated in diabetic, insulin resistant mice<sup>57,58</sup>. Together,  
242 these data indicate that the inflammatory transcriptional signature related to NAFLD is  
243 abolished after timed NAD<sup>+</sup> treatment, possibly through coordinating the action of transcription  
244 factors such as NFkB or FOXA2, and intracellular signaling involving the MTORC1 pathway.

245 **Insulin signaling and rhythmicity in nutrient sensing pathways are rescued by NAD<sup>+</sup>**  
246 **oscillations in obese mice.**

247 Transcriptional networks uncovered in these analyses together with measurements of  
248 metabolic parameters are strongly suggestive of restored insulin sensitivity and nutrient  
249 sensing molecular pathways after reestablishing NAD<sup>+</sup> oscillations in obese mice. To confirm  
250 this at the molecular level, we first evaluated phosphorylation of AKT1, a key kinase effector of  
251 insulin signaling<sup>59</sup>, along the day. As previously described, AKT1 phosphorylation at Ser 474  
252 (p-AKT(S473)) appeared cyclic in CD fed mice<sup>60</sup>, with a peak at ZT18 (Figure 4F, S4A),  
253 coincident with highest food intake (Figure S1C). In contrast, in HFD fed mice, p-AKT(S473)  
254 was constitutively low, suggestive of insulin resistance in the liver of obese mice (Figure 4F,  
255 S4A). Remarkably, we found restoring hepatic NAD<sup>+</sup> oscillations in obese mice specifically  
256 increased p-AKT(S473) at ZT12 (Figure 4F, S4A.  $P < 0,0001$ ; two-way ANOVA, Tukey post-  
257 test), hence imposing daily oscillations to insulin signaling. Furthermore, diurnal rhythms in  
258 AMPK phosphorylation at T172 were also restored by NAD<sup>+</sup> treatment in obese mice, although  
259 with a unique peak at ZT12, which was six hours phase delayed compared to their control,  
260 lean littermates (Figure 4F, S4B). This is in keeping with our previous observation of a  
261 reduction of CRY1 protein in the HFN group specifically at ZT12 (Figure 3B, 3C), as AMPK  
262 rhythmically phosphorylates and destabilizes CRY1<sup>61</sup>. Concomitantly, the AMPK substrate  
263 ULK<sup>62</sup> appeared hyperphosphorylated in the livers of NAD<sup>+</sup> treated mice at ZT12 (Figure S4C).

264 Following the lead from our transcriptomic analyses, we also explored mTORC1 function.  
265 mTOR S2448 phosphorylation and activity appear rhythmic in the mouse liver, coordinating a  
266 number of functions around the day, including ribosome biogenesis<sup>63,64</sup> (Figure 4G). High fat  
267 feeding constitutively induced mTOR phosphorylation, and timed NAD<sup>+</sup> treatment in obese  
268 mice downregulated it (Figure 4G, S4D). We investigated the phosphorylation of p70-S6K  
269 (S6K) as a readout of the activity of mTORC1<sup>65</sup>, and found that the diurnal profile of activation  
270 of S6K-Thr389 phosphorylation was completely restored by NAD<sup>+</sup> chronotherapy in the livers  
271 of HFD-fed mice (Figure 4G, S4E). Additional mTOR downstream signaling revealed by  
272 phosphorylation of 4EBP1(Thr37/46) was reduced in obese, NAD<sup>+</sup> treated mice (Figure 4G,  
273 S4F). We also observed that the mTORC1 agonist p90-S6K (RSK)<sup>65,66</sup> and its activity as  
274 monitored by its phosphorylation in the Thr359 were significantly downregulated in the HFN  
275 group respect to the HF (Figure 4G, S4G). These results reinforce our pathway and gene set  
276 enrichment analyses comparing HF and HFN groups, consistent with reduced function of  
277 mTORC1 pathway after recovering NAD<sup>+</sup> oscillations in obese mice.

278 **A unique NAD<sup>+</sup> transcriptional signature identifies new pathways linked to metabolic**  
279 **improvement.**

280 We sought to explore the transcriptional signature induced by oscillatory NAD<sup>+</sup>, by identifying  
281 DE genes specifically in the HFN group. We found just 74 genes changing their expression at  
282 ZT6, and 196 at ZT18 (Figure 4H, 4I, Table S3). Functional analyses did not retrieve any  
283 significant enrichment for these genes at ZT6; however, it became very evident that at ZT18, a  
284 large part of the DE genes after NAD<sup>+</sup> treatment were overexpressed and functionally involved  
285 in intracellular vesicle transport and catabolic processes (Figure 4I, 4J, Table S3). Indeed, five  
286 members of the Rab family of small GTPases, know regulators of membrane trafficking<sup>67</sup>, were

287 specifically overexpressed after NAD<sup>+</sup> treatment, including *Rab1b*, *Rab7a*, *Rab10* which are  
288 largely involved in mediating autophagy<sup>68-71</sup>, and *Rab6a*, *Rab8a*, which also mediate receptor  
289 trafficking in response to insulin signaling<sup>72,73</sup>. Additional overexpressed genes by NAD<sup>+</sup> known  
290 to regulate autophagy were *Psen1*<sup>74</sup>, *Vps28*<sup>75</sup>.

291 A search for *de novo* motif enrichment within the promoters of NAD<sup>+</sup>-induced genes yielded  
292 matrices with high similarity to the binding sites for NR2E1 (TLX) and HNF4 $\alpha$  TFs, both  
293 implicated in maintaining lipid homeostasis in the liver<sup>76,77</sup>. Also, a motif recognized by IRF3  
294 and NR4A1 (Nur77) appeared significantly enriched (P= 1e-5), and interestingly, Nur77 has  
295 been shown to regulate the cytoplasmic shuttling of LKB1, hereby phosphorylating and  
296 activating AMPK<sup>78</sup>. Together, these data indicate that oscillatory NAD<sup>+</sup> in obese mice activates  
297 a gene expression program favoring processes highly demandant for vesicle trafficking, such  
298 as translocation of membrane receptors or autophagy, and reinforce the idea of  
299 pharmacological supply of NAD<sup>+</sup> preferably targeting activation of AMPK even in the context of  
300 high caloric feeding.

### 301 **Time-of-day determines the efficacy of NAD<sup>+</sup> as a treatment for diet-induced metabolic** 302 **dysfunction.**

303 To investigate if the beneficial effects of pharmacological restitution of NAD<sup>+</sup> oscillations  
304 depend on the time of the day, we supplied NAD<sup>+</sup> in opposite phase to its natural rhythmicity,  
305 hereby at the end of the active phase in mice, ZT23 (HFN23 group). In these HFN23 mice,  
306 oscillations of hepatic NAD<sup>+</sup> were induced with antiphase respect to CD and HFN mice,  
307 showing a peak at ZT0 and decreasing at ZT12-18 (Figure S5A, S5B). As shown in mice  
308 treated at ZT11 (HFN), these also showed mild, albeit non-significant, weight loss after one  
309 week of treatment (Figure 5A, week 9). Contrary to the HFN group, mice supplied at ZT23

310 gained weight during weeks 10 and 11 (Figure 5A). Instead, after three weeks of treatment,  
311 mice treated with NAD<sup>+</sup> at ZT11 had lost ~5% of body weight, while those treated at ZT23 were  
312 ~2% heavier (Figure 5B), illustrating significant differences on the efficacy of the treatment  
313 depending on the time of administration. Notably, total food intake was comparable for all high-  
314 fat fed mice, and before and after the treatment no significant differences were found (Figure  
315 5C, S5C, Two-way ANOVA with post-test). Serum insulin was significantly higher in mice  
316 injected at ZT23 particularly during the dark phase (Figure 5D, S5D), indicating insulin  
317 resistance in these mice, although NAD<sup>+</sup> therapy was effective to reduce fasting serum  
318 glucose independently of the time of supply (Figure S5E). These results indicate that in obese  
319 mice treated with NAD<sup>+</sup> at ZT23, insulin clearance or the feedback inhibition of insulin  
320 secretion are impaired, which is a sign of persistent metabolic dysfunction in these mice<sup>79</sup>.  
321 Along these lines, we performed GTT and ITT at ZT4, because the effects of NAD<sup>+</sup> supply at  
322 ZT11 tended to be more pronounced during the light phase (Figures 1E-H). We found that at  
323 the end of the treatment with NAD<sup>+</sup> at ZT23 (day 20, HFN23), glucose and insulin tolerance  
324 showed non-significant improvement compared to the HF-fed mice. Actually, the NAD<sup>+</sup>  
325 treatment at ZT11 was significantly more favorable to improve glucose homeostasis than at  
326 ZT23 (Figures 5E, 5F, S5F, S5G; One-way ANOVA followed by Tukey's posttest).  
327 Quantification of the relative improvement to the obese non-treated mice showed that after 10  
328 days of treatment, NAD<sup>+</sup> was effective to improve GTT and ITT only when supplied at ZT11,  
329 but not at ZT23. At the end of the treatment (day 20), NAD<sup>+</sup> supply at ZT11 showed still  
330 significantly better performance than at ZT23 (Figure 5G, Two-way ANOVA followed by  
331 Tukey's posttest).

332 Circulating triglycerides, largely known to be reduced by the NAD<sup>+</sup> precursor niacin<sup>80,81</sup>, were  
333 decreased along the day to normal levels by NAD<sup>+</sup> only when the treatment was performed at  
334 ZT11, but not at ZT23 (Figure 5H). Interestingly, serum triglycerides were rhythmic for all  
335 groups; yet specific to the HFN23 group was that highest levels appeared at daytime, thus  
336 presenting antiphase daily oscillations (Figure 5H). We found a very significant reduction in  
337 serum triglycerides only when NAD<sup>+</sup> was injected at ZT11, while injection at ZT23 kept serum  
338 triglyceride levels significantly higher than injection at ZT11 (Figure 5H,  $P < 0.05$ ; One-way  
339 ANOVA with Tukey's post-test). Besides, hepatic steatosis was reduced to a similar extent in  
340 HFN and HFN23 groups (Figure 5I-K, S5G-I). However, we observed opposite daily dynamics  
341 in hepatic PPAR $\gamma$  protein levels, and in its transcriptional activator CEBP $\alpha$  (Figure 5L-M),  
342 which together with the serum triglycerides analyses, suggest that lipid metabolism might be  
343 distinct.

344 **NAD<sup>+</sup> chronotherapy at ZT11 effectively coordinates hepatic intracellular signaling and**  
345 **gene expression driving lipid oxidation.**

346 To further disentangle the molecular pathways responsible for the physiological differences in  
347 glucose and insulin tolerance, and circulating triglycerides, between HFN and HFN23 groups  
348 of obese mice, we compared nutrient sensing signaling in the liver from these mice. Western  
349 blot experiments showed that providing NAD<sup>+</sup> at ZT23 to obese mice did not recapitulate  
350 hepatic AKT phosphorylation and activity, as did at ZT11 (Figure 6A-B), hereby confirming that  
351 insulin signaling remains defective in mice treated at ZT23, as suggested by the ITT (Figure  
352 5F, S5B). Additionally, the response to starvation signaling converging into AMPK-T172  
353 phosphorylation and subsequent activation triggered at ZT12 after reinstating NAD<sup>+</sup>  
354 oscillations was not induced in the livers of the HFN23 group (Figure 6A-B). Furthermore,



355 nutrient sensing by mTOR pathway appeared active through the day in livers from HFN23  
356 group, as shown by persistent phosphorylation of p70-S6K-T389 (Figure 6C-D), and  
357 contrasting with the rhythmic pattern observed in the HFN11 group. Moreover, RSK-T359  
358 appeared hyperphosphorylated in the HFN23 group, also showing antiphase dynamics  
359 compared with the HFN group (Figure 6C-D). These data clearly show that increased NAD<sup>+</sup>  
360 levels at the end of the activity period are less efficient in synchronizing mTOR signaling  
361 pathway than high NAD<sup>+</sup> at the onset of activity, and reinforce the notion of a  
362 chronotherapeutic approach as the best therapy for the treatment of metabolic diseases by  
363 NAD<sup>+</sup> boosters.

364 It is widely accepted that AMPK regulates lipid metabolism through phosphorylation of acetyl-  
365 CoA carboxylase 1 (ACC1) at Ser79 and ACC2 at Ser212. These in turn downregulate the  
366 production of malonyl-CoA, the major substrate for fatty acid synthase (FAS) and a strong  
367 inhibitor of carnitine palmitoyl transferase 1 (CPT1). Consequently, fatty acid synthesis is  
368 suppressed in favor of lipid oxidation, partially through activation of the rate limiting step  
369 sustained by CPT1<sup>82</sup>. Additionally, increased fatty acid oxidation has been largely recognized  
370 as a major metabolic outcome after pharmacological increase of NAD<sup>+</sup> <sup>40,83</sup>, and this process  
371 appears rhythmic in mouse liver with increased rate near the end of the rest period <sup>21</sup>. Also, our  
372 gene expression data revealed a unique NAD<sup>+</sup> transcriptional signature involving genes  
373 pertaining to catabolic processes at ZT18 (Figure 4J). Hence, we sought to explore the diurnal  
374 transcriptional profile of genes involved in lipid oxidation. Selected transcripts from the  
375 microarray data and the key rate-limiting enzymes *Cpt1a*, *Cpt2*, *Acox1*, *Abcd1* were quantified  
376 in the livers from all groups (Figure 6E-G). As expected, we found that genes involved in  $\beta$ -  
377 oxidation, either mitochondrial (*Cpt1a*, *Cpt2*, *Acot2*, *Crat*, *Acaa1b*, *Acsm1*, *Echs1*; Figure 6E)

378 or peroxisomal (*Acox1*, *Abcd1*, *Slc27a2*; Figure 6F), and in  $\omega$ -oxidation (*Cyp4a10*, *Cyp4a14*,  
379 *Cyp4a31*; Figure 6G) were globally overexpressed in HFD-fed mice compared to lean mice<sup>84</sup>.  
380 Interestingly, almost all genes were significantly overexpressed specifically at ZT18 in obese  
381 mice treated with NAD<sup>+</sup> at ZT11 (HFN), but not at ZT23 (HFN23). Indeed, fatty acid oxidation-  
382 related genes were highly expressed at the end of the rest period (~ZT12)<sup>84</sup>; yet, unique to the  
383 HFN group was that the breadth of transcriptional activity further extended through the active  
384 period, reaching significantly higher levels than in the non-treated, obese mice (HF) at ZT18  
385 (Figures 6E-G,  $P < 0.05$ ,  $**0.01$ ,  $***0.001$  Two-way ANOVA with Tukey post-test). Hereby,  
386 expression of these genes at ZT18 was altered depending on the time of NAD<sup>+</sup> treatment, in a  
387 way that the treatment at ZT11 significantly enhanced their expression, whereas in mice  
388 treated at ZT23, expression was significantly reduced to levels largely comparable to the CD  
389 littermates (Figure S6C, One way ANOVA with Tukey posttest). Accordingly, housekeeping  
390 genes *Tbp* and *Rplp* presented no significant variations (Figure S6D). Together, these data  
391 suggest that increased hepatic NAD<sup>+</sup> levels at the beginning of the active phase induce AMPK-  
392 phosphorylation and activity, favoring a transcriptional program of genes involved in fatty acid  
393 oxidation which extends through the active phase, possibly contributing to weight loss and  
394 decreased hepatic and circulating triglycerides specifically in HFN mice.

395 While obese mice treated with NAD<sup>+</sup> at ZT23 presented some metabolic ameliorations mostly  
396 consisting of improved glycemic levels and reduced hepatic steatosis, we did not find  
397 consistent changes in gene expression or nutrient sensing signaling. Intriguingly, our  
398 microarray data showed that transcripts with highest fold change after NAD<sup>+</sup> treatment were  
399 Metallothionein 1 and 2 (*Mt1* and *Mt2*), two antioxidants and longevity regulators known to  
400 protect from HFD-induced obesity<sup>85-87</sup>, and these transcripts were significantly more

401 overexpressed in obese mice treated with NAD<sup>+</sup> at ZT23 (Figure S6E, P<0,001 HFN vs  
402 HFN23; Two Way ANOVA with Tukey's posttest). A similar case was found for the gene  
403 lipocalin 2 (*Lcn2*), which encodes for a secreted protein protective against NAFLD<sup>88</sup>. Hence,  
404 while NAD<sup>+</sup> chronotherapy works optimally at ZT11, its supply at ZT23 induces distinct  
405 protective pathways responsible for a mild, albeit noticeable, improvement of HFD-induced  
406 metabolic disease.

#### 407 **Timed NAD<sup>+</sup> treatment resets the hepatic clock.**

408 Chronotherapy with NAD<sup>+</sup> at ZT11 and ZT23 led to significantly different consequences in  
409 metabolic fitness and daily gene expression in the liver of obese mice. Hence, we reasoned  
410 that the molecular clock might be responsible for daily variations in the effectiveness of the  
411 treatment. Thereby, we compared the hepatic clock protein expression along the day between  
412 obese mice treated at ZT11 and at ZT23 (Figure 7A). Western blot analyses revealed a  
413 remarkable impact of NAD<sup>+</sup> treatment at ZT23 in the dynamic expression of the clock proteins  
414 CRY1, PER2 and REV-ERB $\alpha$ , which displayed an almost complete antiphase dynamic (Figure  
415 7A, 7B). Concomitantly, BMAL1 phosphorylation was also 6-10 hours phase-shifted by NAD<sup>+</sup>  
416 treatment at ZT23, being higher at ZT0 (Figure 7A, 7B, Two-Way ANOVA). Subsequently, we  
417 explored the expression of clock genes across the day (Figure 7C). Strikingly, NAD<sup>+</sup> treatment  
418 at ZT23 in obese mice induced a transcriptional rewiring of clock genes, whose expression  
419 almost perfectly mirrored that of the other groups, demonstrating that at ZT23, NAD<sup>+</sup>  
420 synchronizes the hepatic clock genes' expression. Consequently, the average acrophases of  
421 the oscillations, defined as the highest point of the fitted wave by CircWave, was phase shifted  
422 by 10-12 hours in the HFN23 group in all tested clock genes, both activators (*Bmal1*, *Clock*)  
423 and repressors (*Cry1*, *Per1*, *Per2* and *Rev-Erb $\alpha$* ) (Figure 7C, S7E). Indeed, NAD<sup>+</sup>

424 chronotherapy did not compromise rhythmicity in clock gene expression (Figure S7E,  $P < 0.05$ ;  
425 CircWave  $F$ -test). To determine whether the observed antiphase dynamic of the clock  
426 transcriptional regulators was functional, we selected the genes *Dbp*, *Tef*, *Nfil3* and *Noct*,  
427 whose expression is directly and mostly controlled by the core clock machinery, and analyzed  
428 their hepatic expression around the day (Figure 7D). Coincident with the clock gene  
429 expression, the daily transcriptional profile of clock-controlled genes appeared rhythmic for all  
430 groups, and phase-inverted specifically in the obese mice treated with  $\text{NAD}^+$  at ZT23, with a  
431 significant phase shift of 11-13 hours for *Dbp*, *Tef* and *Noct*, and ~8 hours for *Nfil3* expression  
432 (Figure 7D, S7E). Because redox rhythms regulate DNA binding of CLOCK:BMAL1  
433 heterodimers *in vitro*<sup>89</sup>, and the  $\text{NAD}^+$  precursor NR increases BMAL1 recruitment to chromatin  
434 in livers from aged mice<sup>46</sup>, we hypothesized that inverted expression of clock genes in HFN23  
435 might be driven by time-specific recruitment of BMAL1 to chromatin. To test this, we performed  
436 ChIP analyses to measure BMAL1 binding to regulatory E-boxes of clock and clock-controlled  
437 genes (Figures 7E and 7F). As described<sup>90</sup>, we observed increased recruitment of BMAL1 at  
438 ZT6 in livers from CD, HF and HFN groups of mice for all tested E-boxes. Notably, in livers  
439 from HFN23 mice, BMAL1 binding appeared significantly increased at ZT18, consistent with  
440 inverted expression (Figures 7E, 7F;  $P < 0.05$ , Two-way ANOVA with Tukey's post-test). A non-  
441 related region at the 3' UTR region of *Dbp* gene was used as a negative control. We further  
442 evaluated the effect of  $\text{NAD}^+$  supplementation in the expression of  $\text{NAD}^+$  biosynthesis and  
443 salvage genes *Nmrk1*, *Nampt*, *Nmnat3* and *Nadk* which also showed inverted phase  
444 specifically in HFN23 mice (Figure 7G). Accordingly, BMAL1 binding to their regulatory  
445 elements was increased at ZT18 in HFN23 mice, yet specific to these group of genes was that  
446  $\text{NAD}^+$  treatment significantly potentiated BMAL1 recruitment to chromatin. Finally, we explored

447 the expression from TFs collaborating with the clock machinery to sustain a rhythmic  
448 transcriptional reprogramming in obesity<sup>16,84</sup>: *Pparg2*, *Ppara* and *Srebf1c*. Transcription for  
449 these genes was phase-inverted specifically in HFN23 mice, which was also accompanied by  
450 differential BMAL1 chromatin recruitment (Figure 7H). Also, expression levels of additional TFs  
451 related to hepatic lipid metabolism *Hnf4a*, *Foxa2*, *Foxo1* and *Cebpa* were altered to a similar  
452 extent (Figure S7B). Antiphase expression of key transcription factors regulating hepatic lipid  
453 metabolism might underlie the inverted pattern of circulating triglycerides in HFN23 mice  
454 (Figure 5H), but other lipids synthesized in the liver might be affected. Accordingly, hepatic  
455 cholesterol levels also showed a phase inverted pattern in the liver of HFN23 mice (Figure  
456 S7C, S7D), reinforcing the idea that NAD<sup>+</sup>-mediated synchronization of transcriptional rhythms  
457 in the liver inverts hepatic lipid metabolism. Together, this data demonstrates a time-  
458 dependent transcriptional response to NAD<sup>+</sup> therapy in the liver of obese mice, through the  
459 synchronization of BMAL1 recruitment to chromatin and rhythmic transcription of clock and  
460 clock-controlled genes. Hereby, BMAL1 plays a pivotal role translating fluctuations in NAD<sup>+</sup>  
461 levels to shape circadian transcription.

462 A phase-inverted hepatic clock has been previously shown for mice subjected to inverted  
463 feeding rhythms, where the SCN clock remains aligned to light-dark cycles<sup>91,92</sup>. At this regard,  
464 in all tested groups of mice, clock gene expression in the SCN remained largely intact after  
465 NAD<sup>+</sup> treatment (Figure 8A, Two-way ANOVA), and locomotor behavior analyses showed that  
466 overall, NAD<sup>+</sup> treatment preserved alignment between light-dark and rest-activity patterns  
467 (Figure 8B). Quantification of locomotion in 30 minutes bins revealed that after NAD<sup>+</sup>  
468 treatment, mice became significantly less active for either 90 minutes (HFN) or 30 minutes  
469 (HFN\_23) windows (Figures 8C, S7E, Two-way ANOVA followed by Sidak's posttest). We next

470 questioned whether feeding cycles might be altered by NAD<sup>+</sup> treatment because as previously  
471 reported, this is a cause for uncoupled central and peripheral clocks<sup>91,92</sup>, while NAD<sup>+</sup> itself can  
472 influence feeding behavior through implicated hypothalamic circuits<sup>93,94</sup>. Notably, daily food  
473 intake appeared rhythmic and aligned to light-dark cycles for all groups of HF diet fed mice  
474 (Figures 8D, 8E), showing a more robust day-to-night difference the obese mice treated with  
475 NAD<sup>+</sup> at ZT11 (Figure 8E). Furthermore, we found similar observations when applying a  
476 therapy with the NAD<sup>+</sup> precursor nicotinamide (NAM), which was previously described to boost  
477 hepatic NAD<sup>+</sup> after IP injection in one hour<sup>95</sup>. Hence, three weeks with NAM chronotherapy  
478 performed best when applied at ZT11 to improve body weight, GTT and ITT (Figure S8A-D,  
479 Unpaired Student's *t* test). As shown for NAD<sup>+</sup>, the NAM treatment at ZT23 inverted the  
480 expression of the hepatic molecular clock (Figure S8E), while keeping behavioral locomotor  
481 activity in phase with light/dark cycles (Figure S8F). This reinforces the notion that NAD<sup>+</sup> can  
482 potentially synchronize the hepatic molecular clock, by resetting clock gene expression to  
483 adjust its phase to the time of the day when NAD<sup>+</sup> bioavailability is higher. Collectively, these  
484 data support that boosting NAD<sup>+</sup> levels is an effective treatment for HFD-induced metabolic  
485 disease, and demonstrate that a chronotherapeutic approach is significantly more beneficial  
486 when NAD<sup>+</sup> increases at the onset of the active phase.

487

## 488 **DISCUSSION**

489 In the past decade, therapies oriented to increase endogenous NAD<sup>+</sup> levels have received  
490 much attention as treatments for metabolic disorders. Mounting research in rodents  
491 demonstrate that pharmacological approaches using “NAD<sup>+</sup> boosters” treat the  
492 physiopathology of diet and age-associated diabetes in mice, and reverse cardiovascular

493 disease or muscle degeneration<sup>83</sup>. In humans, the NAD<sup>+</sup> precursor niacin has been largely  
494 used to treat dyslipidemia, and a number of clinical trials are ongoing for other NAD<sup>+</sup>  
495 precursors<sup>96</sup>. However, all these studies and clinical protocols mostly disregard the reciprocal  
496 interactions between circadian rhythms and NAD<sup>+</sup> metabolism. Here, we demonstrate that  
497 NAD<sup>+</sup> can shift the phase of the hepatic molecular clock while preserving the SCN clock largely  
498 intact, and concomitantly, the efficacy of increasing NAD<sup>+</sup> levels to correct metabolic diseases  
499 depends on the time-of-day (Figure 8F).

500 NAD<sup>+</sup> and its phosphorylated and reduced forms, NADP<sup>+</sup>, NADH and NADPH, are  
501 fundamental compounds in intermediary metabolism as hydride-accepting or -donating  
502 coenzymes in redox reactions<sup>97</sup>. NAD<sup>+</sup> is produced in all tissues from the salvageable  
503 precursors NAM, nicotinamide riboside (NR) or niacin, while some tissues such a liver produce  
504 NAD<sup>+</sup> *de novo* from tryptophan, in a much less efficient biosynthetic pathway<sup>30,98</sup>. It is  
505 generally accepted that NR or NAM enter the cell<sup>99</sup>, while extracellular NAD<sup>+</sup> and NMN are  
506 converted to NR<sup>100</sup>. At this regard, the NAD<sup>+</sup> precursors NAM, NMN and NR have been  
507 preferentially used as NAD<sup>+</sup> boosters; however, we set up a therapy with NAD<sup>+</sup> because the  
508 limited data tracing metabolic fluxes suggest distinct, tissue-specific effects of NR and NMN<sup>101</sup>.  
509 Moreover, NAD<sup>+</sup> uptake appears fast and effective in cells, and a mitochondrial active  
510 transporter has been recently described<sup>102-105</sup>. Yet, to gain insights into the bioavailability of  
511 NAD<sup>+</sup> precursors in our study, it would be necessary to unravel the hepatic NAD<sup>+</sup> metabolome  
512 in all tested conditions, as for example, the possibility that time-dependent decline in NADPH  
513 and NADP<sup>+</sup> levels in livers from obese mice<sup>27,35,106</sup> contributes to differences between HFN  
514 and HFN23 mice cannot be ruled out, constituting a limitation of our study. However, we  
515 demonstrated that hepatic NAD<sup>+</sup> levels raised within an hour after IP injection in obese mice,

516 and followed a circadian turnover when administered at ZT11, at the onset of the active phase  
517 (Figure 1B). This chronotherapy recapitulated the metabolic improvements to a similar extent  
518 to the previously reported for the NAD<sup>+</sup> precursors NMN<sup>36,107,108</sup> and NR<sup>32,35,40,43,44,109-111</sup>,  
519 mostly consisting of decreased weight gain, improved insulin sensitivity and glucose tolerance,  
520 decreased circulating leptin and triglycerides, and amelioration of NAFLD with decreased  
521 hepatic pro-inflammatory transcriptional signature (Figures 1, 2, 3). At the molecular level, we  
522 demonstrated that, upon NAD<sup>+</sup> chronotherapy, daily rhythms were restored for hepatic insulin  
523 and nutrient signaling. This was evidenced by rhythms in AMPK-T172 and AKT-S473  
524 phosphorylation, and mTORC1-directed pS6K phosphorylation, which became oscillatory with  
525 peaks during the active phase (ZT12-18; Figure 4F, 4G). Accordingly, we also observed  
526 decreased phosphorylation of p90RSK-T359 (Figure 4G), a positive effector of mTORC1  
527 signaling and driver of NFκB activity<sup>112,113</sup>. It appears conflicting that the AMPK response to  
528 starvation and the mTORC1 nutrient sensing pathways became active at concurrent times  
529 during the day after restoring NAD<sup>+</sup> oscillations in obese mice, as they usually signal opposed  
530 nutritional states and engage into regulatory negative feedback loops<sup>114</sup>. However, recent  
531 research shows that specific activation of AMPK exists which does not lead to mTORC1  
532 inhibition, but instead sustains ULK1 activity and autophagy to preserve protein  
533 homeostasis<sup>115</sup>, which is in keeping with our findings (Figure 4F, 4G, S4C). Notably, a hepatic  
534 NAD<sup>+</sup>-specific transcriptional signature emerged in treated mice related to intracellular  
535 trafficking, consisting of overexpression of the Rab GTPase network regulator of autophagy<sup>70</sup>,  
536 further reinforcing the notion that NAD<sup>+</sup> preferably targets AMPK signaling to activate  
537 autophagy and possibly, translocation of membrane receptors. Along these lines, AMPK has



538 been largely recognized as a therapeutic target for metabolic diseases<sup>116,117</sup>, yet the well-  
539 known circadian fluctuations in its activity<sup>118</sup> have been fully overlooked for treatment.

540 We have demonstrated a time-of-day dependent response to NAD<sup>+</sup> therapy. We observed  
541 significant differences between obese mice treated at ZT11 or at ZT23, where the latter did not  
542 completely recapitulate the metabolic improvements generally resulting from analogous  
543 therapies. Concomitantly, NAD<sup>+</sup> therapy at ZT23 did not trigger AMPK phosphorylation neither  
544 rewiring of mTORC1 signaling in the liver of obese mice. Strikingly, the expression dynamics of  
545 the molecular clock were completely phase inverted in livers from HFN23 and HFNAM\_23  
546 mice, showing that at the onset of the active phase, NAD<sup>+</sup> can efficiently reset the phase of the  
547 hepatic clock (Figures 7, 8, S8). These findings support earlier evidence that specific nutritional  
548 cues are potent zeitgebers for peripheral oscillators<sup>16,47,91,119</sup>, and reinforce the existing notion  
549 of autonomous regulation of hepatic NAD<sup>+</sup> metabolism closely linked to the clock function<sup>26</sup>.

550 Together with our findings, this suggests that the molecular clock acts as a key interface to  
551 induce timing-specific modulation of nutrient and insulin signaling by NAD<sup>+</sup>.

552 Our analyses revealed substantial differences in expression from genes involved in fatty acid  
553 oxidation, with marked downregulation in obese mice treated with NAD<sup>+</sup> at ZT23 (Figure 6E-G,  
554 S6C). In mouse liver, these genes are oscillatory with a peak of expression at the end of the  
555 rest phase<sup>84</sup>. Their expression is to some extent clock-controlled; however, their transcriptional  
556 regulation mostly relies on nutritional cues integrated by intracellular signaling, multiple nuclear  
557 receptors and transcription factors such as PPAR<sub>γ</sub>, PPAR<sub>α</sub> or SREBP1, epigenetic regulators  
558 including MLL1 or SIRT1, and even neural circuits<sup>16,84,120-122</sup>. Untimed NAD<sup>+</sup> rise, through  
559 resetting the circadian machinery and the subsequent misalignment from feeding rhythms,  
560 might hinder the coordinated action between the clock and cooperative transcriptional

561 regulators on chromatin, hereby obstructing the adequate control of specific transcriptional  
562 programs. At this regard, BMAL1 recruitment to chromatin was adjusted by timed NAD<sup>+</sup>  
563 treatment, and when administered at ZT23 led to phase-inverted transcription of direct  
564 CLOCK:BMAL1 targets, as expected for a pioneer-like transcription factor<sup>123,124</sup>. In this  
565 scenario, we found that several master regulators of rhythmic hepatic lipid and cholesterol  
566 metabolism including *Ppara*, *Pparγ*, *Srebp1c*, *Cebpa*, or *Hnf4a*<sup>16,84,125,126</sup> were subjected to this  
567 mechanism, and their phase inversion in HFN23 mice was accompanied by inverted rhythms  
568 in hepatic cholesterol and circulating triglycerides. These results demonstrate that NAD<sup>+</sup>  
569 modulates BMAL1 recruitment to chromatin and shapes rhythmic transcription and  
570 metabolism.

571 NAD<sup>+</sup> is a coenzyme in redox reactions, but also serves as a substrate of NAD<sup>+</sup> consuming  
572 enzymes which cleave NAD<sup>+</sup> to produce NAM and an ADP-ribose product, such as ADP-  
573 ribose transferases, cADP-ribose synthases and sirtuins (SIRT1-SIRT7)<sup>97,127</sup>. Indeed, both  
574 NAD<sup>+</sup> consumers SIRT1<sup>46,128,129</sup> and SIRT3<sup>21</sup> provide reciprocal regulation to the clock  
575 machinery to modulate circadian transcription and metabolism in the liver. Furthermore, recent  
576 research shows that a NAD<sup>+</sup>-SIRT1 interplay mediates deacetylation and nuclear translocation  
577 of PER2 and, in line with our results, shapes BMAL1 function, while this control is altered in  
578 livers from aged mice<sup>46</sup>. Through activation of SIRT1 and SIRT3, it is also possible that rising  
579 NAD<sup>+</sup> at ~ZT12 might contribute to rhythmic lipid oxidation and mitochondrial function driven by  
580 protein acetylation, including PPAR $\gamma$ <sup>27,130</sup>, while keeping the hepatic clock aligned to the  
581 external time. Yet, the regulation of the circadian system by sirtuins in health and disease  
582 remains to be fully disentangled. Circadian misalignment imposed by antiphase NAD<sup>+</sup> in our  
583 HFN23 and HFNAM\_23 mice might obstruct metabolic improvements, through uncoupling of

584 the central light-synchronized and peripheral NAD<sup>+</sup>-synchronized clocks. Although hepatic  
585 neutral lipid content was reduced independently of time-of-treatment (Figure 5I-K), significant  
586 improvement of glucose homeostasis and hepatic insulin signaling were apparent only in HFN  
587 mice. Indeed, circadian misalignment has been extensively reported to drive metabolic  
588 dysfunction both in mouse and humans<sup>131-133</sup>. In this scenario, expression of clock genes in the  
589 SCN was largely intact upon NAD<sup>+</sup> injection, and consequently, locomotor activity remains  
590 aligned with the light-dark cycles also in HFN23 mice (Figure 8A-C). Uncoupled liver and SCN  
591 clocks have been previously reported in mice when access to food is restricted to the light  
592 period<sup>91,134,135</sup>; however, our HFN23 mice did not show significant variations in eating behavior  
593 (Figure 8D-E), evidencing that uncoupling the central and hepatic clocks is a time-dependent  
594 effect of NAD<sup>+</sup> supply. Notably, abnormal metabolic signaling triggered by high-fat diets  
595 uncouples body clocks<sup>15</sup>; thus, it would be interesting to define which extra-hepatic oscillators  
596 are reset by NAD<sup>+</sup>. At this regard, recent reports suggest that the brain blood barrier might be  
597 permeable to NAD<sup>+</sup><sup>136,137</sup> in which case hypothalamic neurons could be influenced. Yet,  
598 further research is necessary to decipher the extent of the modulation of brain clocks by  
599 increased circulating NAD<sup>+</sup> precursors. Additionally, our study is limited by the cellular  
600 heterogeneity in fatty liver, with for example, infiltration of pro-inflammatory macrophages  
601 which have been recently shown to limit NAD<sup>+</sup> bioavailability through high expression of the  
602 NAD-consuming enzyme CD38<sup>138,139</sup>. Hence, it is possible that time-dependent cellular  
603 heterogeneity in liver<sup>140</sup> could contribute to the NAD<sup>+</sup>-dependent improvement of the metabolic  
604 phenotype.

605 In humans, clinical trials aiming to boost endogenous NAD<sup>+</sup> for treatment of metabolic  
606 diseases are increasing, in many cases reporting conflicting results<sup>127</sup>. All these studies mostly

607 overlook the time of drug intake, which is selected based on practicalities or attempting to  
608 displace side effects from the patient's active phase. Considering our results, we propose that  
609 time of treatment dictates the amplitude of metabolic benefits from rising NAD<sup>+</sup> levels, which  
610 ideally outlines the basic strategy of chronobiology-based NAD<sup>+</sup> therapy.

611

## 612 **METHODS:**

### 613 **Animals and diets**

614 Four-week-old male C57Bl/6J mice were obtained from the Biological Models Unit at the  
615 Instituto de Investigaciones Biomédicas (UNAM, Mexico). The mice were kept under a 12:12-h  
616 light:dark cycles. Food and water were provided *ad libitum*. Temperature and humidity were  
617 constantly monitored. Mice were randomly distributed to three groups (20 mice/group). The  
618 control group was fed during eleven weeks with normal chow (CD, 2018S Teklad, ENVIGO),  
619 bearing 24% calories from protein, 18% calories from fat and 58% calories from  
620 carbohydrates. The other two experimental groups were fed a high fat diet (HFD, based on  
621 TD.160547 Teklad, ENVIGO), consisting of 15% calories from protein, 53% calories from fat  
622 and 38% calories from carbohydrates, and customized to match NAD<sup>+</sup> dietary sources content  
623 to that of the CD (0,2% tryptophan and 115 mg/kg nicotinic acid). Food intake and body weight  
624 were measured once a week. For daily food intake measurements, mice were single housed,  
625 and measurements were recorded for one week.

626 All animal experimental procedures were reviewed and approved by the Internal Committee for  
627 the Care and Use of Laboratory Animals (CICUAL) at the Instituto de Investigaciones  
628 Biomédicas, (UNAM, Mexico), and are registered under protocol no. ID240.

629

## 630 **Chronotherapy with NAD<sup>+</sup> and NAM**

631 NAD<sup>+</sup> and NAM were purchased from SIGMA (cat. no. N7004, N0636) and were dissolved in  
632 0.9% NaCl isotonic saline solution and filter sterilized. To determine the NAD<sup>+</sup> dose, we  
633 wanted to keep two premises: 1) to keep NAD<sup>+</sup> levels into the physiological range, and 2)  
634 avoid undesirable secondary effects of high doses. To do so, we chose the range of tested  
635 doses based on previous reports<sup>94,141,142</sup>, and treated mice with IP injection of 800, 100, 50 or  
636 10 mg/kg body weight, while keeping a constant volume of approximately 180  $\mu$ l. Control mice  
637 were injected with isotonic saline solution. C57Bl/6J male mice (n=3) were IP injected, and  
638 sacrificed one hour later. NAD<sup>+</sup> was measured by HPLC as described below. Because we  
639 planned on a chronic treatment, the minimum dose inducing a statistically significant increase  
640 in hepatic NAD<sup>+</sup> with respect to control livers was selected as the experimental dose (Figure  
641 S1A, 50 mg/Kg of body weight:  $P < 0.001$ , One-way ANOVA with Tukey's posttest). Hence, for  
642 all experiments, mice were IP injected with 50 mg/kg of NAD<sup>+</sup> for 20 consecutive days, either  
643 at ZT11 (one hour before lights off), or at ZT23 (one hour before lights on). Of note, we didn't  
644 find differences in hepatic NAD<sup>+</sup> at a dose of 10 mg/kg, a reason why we did not try lower  
645 concentrations. The dose for NAM treatment (200 mg/kg) was selected based on previous  
646 reports<sup>95,143-145</sup>.

## 647 **Detection and quantification of NAD<sup>+</sup> by HPLC.**

648 NAD<sup>+</sup> measurements were performed according to Yoshino and Imai 2013<sup>146</sup>, with subtle  
649 modifications. 100 mg of frozen tissue were processed in a final volume of 2 ml of 10% HClO<sub>4</sub>  
650 with a Polytron homogenizer (Kinematica CH-6010 Kiriens-Lu) and centrifuged at 13,000 rpm  
651 for 5 min at 4°C. The supernatant was neutralized adding a one-third volume of 3M K<sub>2</sub>CO<sub>3</sub>,  
652 and vortexed. After 10 min of incubation on ice, samples were cleared by a 13,000 rpm

653 centrifugation at 4°C during 5 min. The supernatant was diluted at 30% with 50 mM phosphate  
654 buffer (3.85% of 0.5 M KH<sub>2</sub>PO<sub>4</sub>, 6.15% of 0.5 M K<sub>2</sub>HPO<sub>4</sub>, 90% HPLC grade water -v/v/v-, pH  
655 7.0, filtered through a 0.22 µm filter and degassed). 50 µl of the samples were analyzed using  
656 a 1260 infinity quaternary LC VL HPLC system (Agilent) attached to a diode array detector.  
657 Analytes were separated on a ZORBAX Eclipse XDB-C18 4.6x150 mm, 5 µm column (Agilent  
658 p/n 993967-902). For the HPLC, the gradient mobile phase was delivered at a flow rate of  
659 1ml/min, and consisted of two solvents: (A) 50 mM phosphate buffer pH 6.8 and (B) methanol  
660 100%. The initial concentration of A was 100%, the solution was held into the column for 5 min  
661 and then B was progressively increased to 5% over 1 min, held at 5% B for 5 min, followed by  
662 an increase to 15% B over 2 min, held at 15% B for 10 min and returned to starting conditions  
663 of 100% A in 1min, and held at 100% A for 6 min. NAD<sup>+</sup> was detected using a sample  
664 wavelength of 261 nm and reference wavelength of 360 nm. Adequate standards including  
665 NAD<sup>+</sup> were used for calibration and identification of the retention/migration time of NAD<sup>+</sup> within  
666 the samples. Instrument control, data acquisition and analysis were performed using the  
667 Agilent ChemStation system for LC, according to manufacturer's instructions. NAD<sup>+</sup> levels  
668 were quantitated based on the peak area in the chromatograms compared to a standard curve  
669 and normalized to tissue weight.

#### 670 **Glucose Tolerance Test (GTT) and Insulin Tolerance Test (ITT)**

671 At 8, 10 and 11 weeks of experimental paradigms, mice were subjected to either 12h or 5h of  
672 fasting, followed by a glucose tolerance test (GTT) or an insulin tolerance test (ITT)  
673 respectively. For the GTT, IP injection of D-glucose (SIGMA cat no. G7021) at 2mg/kg was  
674 used, while for ITT, human insulin (Eli Lilly cat. HI0210) at 0.6 U/kg was IP injected. Circulating  
675 glucose was measured from a tail-tip blood drop, using an ACCU CHEK active glucometer

676 (ROCHE) at time points 0 (before injection) and 15, 30, 60 and 120 min after IP injection of  
677 either glucose (GTT) or insulin (ITT). Experiments were performed per triplicate, using 5-6  
678 mice per experiment.

### 679 **Metabolites and Hormone Analyses**

680 Blood serum was collected postmortem by cardiac puncture. Triglycerides (TG) in serum and  
681 liver were measured using the Triglyceride Colorimetric Assay Kit (Cayman Chemical, cat. no.  
682 10010303). Free fatty acid content was determined with the Free Fatty Acid Fluorometric  
683 Assay Kit (Cayman Chemical, cat. no. 700310). Serum insulin and leptin levels were measured  
684 by ELISA, using the Ultra-Sensitive Mouse Insulin ELISA Kit (Crystal Chem Inc, cat. no.  
685 90080) and the Mouse Leptin ELISA Kit (Crystal Chem Inc, cat. no. 90030) according to the  
686 manufacturer's instructions. Hepatic cholesterol was determined using a Cholesterol  
687 Quantitation Kit (Sigma-Aldrich cat. no. MAK043, colorimetric). Data was collected using a  
688 Synergy H1 microplate reader (BioTek).

### 689 **Temperature Measurements**

690 Rectal temperature in mice (n=10 mice, and 3 technical replicates) was registered using a  
691 portable digital thermometer (BIOSEB) every 3 hours throughout 24 hours. For the acquisition  
692 of infrared thermography, mice were placed inside an acrylic box in darkness. Thermal images  
693 were acquired at ZT12 using an Inframetrics C2 Thermal Imaging System Compact Pocket-  
694 Size camera (FLIR Systems) with a frequency of 9Hz, thermal sensitivity <0.10 ° C, resolution  
695 80 × 60 (4,800 pixels) and temperature range of 14 to 302 ° F. (n= 4, with 3 technical  
696 replicates). Images processing was performed using FLIR-Tools software (2020 FLIR®  
697 Systems).

698

699 **Oil-Red-O staining**

700 Frozen OCT embedded liver tissues were cut into 10- $\mu$ m sections using a Leica cryostat and  
701 air dried for 10 min at room temperature. Slides were briefly washed with PBS and fixed for  
702 2 min with 4% fresh paraformaldehyde. Preparation of Oil Red O (SIGMA, cat. no.O1391)  
703 working solution and staining of slides was performed according to Mehlem *et al*<sup>147</sup>. Oil Red O  
704 working solution (3.75 mg/ml) was applied on OCT embedded liver sections for 5 min at RT.  
705 Slides were washed twice during 10 min. in water, and mounted in vectashield mounting media  
706 (Vector Labs, cat. no. H-1000). The images were captured with the camera AxioCam EEc 5s  
707 coupled to a ZEISS Primovert microscope, using a 40X magnification. The background was  
708 corrected by white balance and was selected as a blank area outside the section. For  
709 representative images, some sections were stained with Gil I haematoxylin. Surface of lipid  
710 droplets was quantified using the ImageJ software, by converting RGB to 8-bit grayscale  
711 images, and then using the “analyze particles” plug-in to measure the area and size of the lipid  
712 drops<sup>148</sup>. Three frames per biopsy were used for image analyses and quantification (n=3  
713 biological replicates with 3 technical replicates).

714 **SCN dissection**

715 For gene expression analysis from the SCN, frozen brains were placed on ice, and the 1mm<sup>3</sup>  
716 region above the optic chiasm was dissected out using microscissors. Tissues were placed in  
717 microcentrifuge tubes in 100  $\mu$ l of Trizol and kept at -80°C until use. Total RNA was  
718 subsequently extracted and resuspended in 12  $\mu$ l of water.

719 **Total RNA extraction**

720 20 mg of liver tissue or the dissected SCN, were homogenized (Benchmark Scientific, D1000  
721 homogenizer) for 30 seconds with 0.5 ml of Trizol (TRIzol™ Reagent, Invitrogen, cat. no.



722 15596018). The homogenate was incubated for 5 min at RT, then 0.1 ml of chloroform was  
723 added, shaken and incubated at RT for 3 min followed by a centrifugation during 15 min at  
724 13,000 rpm at 4 °C. The upper phase was extracted, and 0.25 ml of isopropanol was added.  
725 After a 10 min incubation at RT, RNA was precipitated by centrifugation for 10 min at 13,000  
726 rpm and 4 °C. The RNA was washed with 1 ml of 75% ethanol and resuspended in 20 µl of  
727 molecular biology grade water (Corning, cat. no. 46-000). 2 µl of the sample were used to  
728 quantify its concentration and assess its quality in a NanoDrop (Thermo Scientific)

### 729 **cDNA synthesis**

730 It was performed using the kit iScript™ cDNA synthesis (Bio-Rad, cat. no 1708890). 500 ng of  
731 RNA were mixed with 2 µl of 5X iScript Reaction Mix and 0.5 µl of the enzyme iScript Reverse  
732 transcriptase in a volume of 10 µl. The thermal cycler (Axygen MaxyGene™ II) was  
733 programmed as follows: Alignment for 5 min at 25 °C, reverse transcription for 20 min at 46 °C  
734 and inactivation for 1 min at 95 °C. The reaction was cooled to 4 °C and diluted to 5 ng/µl.

### 735 **Quantitative real-time polymerase chain reaction**

736 The reactions were performed in a final volume of 10 µl, adding 5 µl of the Universal SYBR  
737 Green Super Mix reagent (Bio-Rad, cat. No. 1725121), 1 µl of 2.5 µM forward and reverse  
738 primers and 7.5 ng of cDNA per reaction. The thermal cycler (Bio-Rad, CFX96 Touch Real-  
739 Time PCR Detection System) was set to the following program: 30s at 95 °C followed by 40  
740 cycles of 5s at 95 °C and 30s at 65 °C. Single-product amplification was verified by an  
741 integrated post-run melting curve analysis. Values were normalized to the housekeeping  
742 genes *B2m*, *Ppia* and *Tbp*. The geometric mean was used to determine Ct values of the  
743 housekeeping genes and expression values for the genes of interest were calculated using  
744  $\Delta$ CT methodology. Primer sequences are available in Supplementary Table 4.

## 745 **mtDNA Quantification by Quantitative Real-Time PCR**

746 10 mg of liver were used to extract DNA with the DNeasy Blood & Tissue Kit (QIAGEN, cat.  
747 no. 69506), according to the manufacturer's instructions. Quantitative PCR was performed  
748 using 7.5 ng of DNA and 2.5  $\mu$ M of S18 and mtCOX1 primers as described for cDNA  
749 quantification, with a program of 20 min at 95°C, followed by 50 to 55 cycles of 15s at 95°C,  
750 20s at 58°C and 20s at 72°C. Single-product amplification was verified by an integrated post-  
751 run melting curve analysis. 5-6 mice were analyzed for each time point and condition, with two  
752 technical replicates. mtDNA content using the formula:  $2 \times 2^{(\Delta CT)}$ , where  $\Delta CT$  is the difference of  
753 CT values between S18 gene and mtCOX1 gene<sup>149</sup>.

## 754 **Transcriptional profiling from mouse livers**

755 Liver RNA samples for microarray analysis were prepared using our previously described  
756 procedures, with slight modifications. Briefly, total RNA was first extracted with TRIzol Reagent  
757 (Invitrogen), then cleaned with RNeasy Mini purification Kit (QIAGEN cat. no. 74106) according  
758 to the manufacturer's RNA CleanUp protocol. RIN values ( $\geq 7.0$ ) were validated with an Agilent  
759 Bioanalyzer 2100. 900 ng of total RNA per sample was used as a template to obtain cDNA  
760 with the GeneChip cDNA synthesis Kit (Affymetrix, Santa Clara, CA). Microarray experiments  
761 were conducted by the Microarray Unit at the National Institute of Genomic Medicine  
762 (INMEGEN, Mexico City) using the mouse Clariom™ D Assay (Applied Biosystems™), as per  
763 manufacturer's instructions. Microarray experiments were performed in triplicate (n=3  
764 biological replicates). The Clariom™ D Array consists of 66100 genes (transcript clusters),  
765 214900 transcripts, 498500 exons and 282500 exon-exon splice junctions from *Mus musculus*.  
766 Sequences are mapped to the National Center for Biotechnology Information (NCBI) UniGene  
767 database. The arrays were scanned in the GeneChip Scanner 3000 7G (Affymetrix) and the

768 GeneChip Command Console Software was used to obtain the .CEL intensity files. Normalized  
769 gene expression data (.CHP files) were obtained with the Transcriptome Analysis Console  
770 (TAC v4.0.1.36) software using default parameters. Changes in gene expression ( $\pm 1$ . fold-  
771 change; FDR-corrected  $p$ -value  $\leq 0.05$ ) were subjected to functional analyses using the  
772 “Compute Overlaps” tool to explore overlap with the CP (Canonical Pathways) and the GO:BP  
773 (GO biological process) gene sets at the MSigDB (molecular signature database). The tool is  
774 available at: <https://www.gsea-msigdb.org/gsea/msigdb/annotate.jsp>, and estimates statistical  
775 significance by calculating the FDR  $q$ -value. This is the FDR analog of the hypergeometric  $P$ -  
776 value after correction for multiple hypothesis testing according to Benjamini and Hochberg.  
777 Gene set enrichment analysis (GSEA) was performed using GSEA v. 4.0.3.<sup>54</sup> to determine the  
778 enrichment score within the Hallmark gene set collection in MSigDB v7.0<sup>150</sup>, selecting the  
779 Signal2Noise as the metric for ranking genes. The findMotifs.pl program in the HOMER  
780 software<sup>151</sup> was used for motif discovery and enrichment, searching within the genomic  
781 regions encompassing 300 Kb upstream and 50 Kb downstream the TSS, and selecting 6-8 bp  
782 for motif length. Motif enrichment is calculated by findMotifs.pl using the cumulative  
783 hypergeometric distribution.

784 All raw and processed data can be accessed at the GEO database, number: GSE163865.

### 785 **Protein carbonyl (PCO) content**

786 The determination of the carbonyl content was performed from total hepatic protein extracts  
787 (0.5 mg/ml), following a previously published protocol<sup>152</sup>. PCO present in the samples were  
788 derivatized by reaction with a working solution of 2,4-dinitrophenylhydrazine (DNPH 10 mM  
789 diluted in 0.5 M H<sub>3</sub>PO<sub>4</sub>; SIGMA) for 10 min at RT. The reaction was stopped by adding a  
790 NaOH (6M) for 10 min. The absorbance of the samples was read in a spectrophotometer

791 (Jenway, 6305) at 370 nm and the mean absorbance of control tubes (RIPA buffer) was then  
792 subtracted. To calculate the PCO concentration expressed as nmol PCO/mg protein, we used  
793 the following equation:

$$794 \quad PCO \text{ concentration} = \frac{10^6 \times \left( \frac{Abs_{366nm}}{22000 M^{-1} * cm^{-1}} \right)}{[protein]_{mg/ml}}$$

## 795 **Western Blot**

796 Livers were lysed in 1X RIPA buffer supplemented with a protease/phosphatase inhibitor  
797 cocktail (cOmplete mini ROCHE 1:25 v/v, PMSF 1mM, Na<sub>3</sub>VO<sub>4</sub> 1mM, NaF 0.5mM). Total  
798 protein was quantified with Bradford reagent (SIGMA, cat. no. B6916) and 25 µg of extract  
799 were suspended 1:6 (v/v) in 6X Laemmli buffer (60 mM Tris HCl pH 6.8, 12% SDS, 47%  
800 glycerol, 0.03% bromophenol blue, 1M DTT), separated on sodium dodecyl sulfate–  
801 polyacrylamide gel electrophoresis (SDS-PAGE), and transferred onto PVDF membranes  
802 (Merck-Millipore), using the Mini-PROTEAN electrophoretic system (Bio-Rad). Membranes  
803 were blocked using non-fat milk in PBST buffer for one hour and incubated with the  
804 corresponding primary antibody overnight at 4°C. Membranes were washed three times with  
805 PBST and incubated with the secondary antibody for 5 hrs at RT. Antibodies used in this study  
806 were: From Cell Signaling: PPAR<sub>γ</sub> (2443), AKT (9272), Phospho-AKT<sub>Ser473</sub> (9271), AMPK<sub>α</sub>  
807 (5831), Phospho-AMPK<sub>α</sub><sub>Thr172</sub> (50081), mTOR (2893), , Phospho-mTOR<sub>Ser2448</sub> (5536),  
808 Phospho-p70 S6K<sub>Thr389</sub> (9234), Phospho-4E-BP1<sub>Thr37/46</sub> (2855), RSK1/RSK2/RSK3 (9355),  
809 Phospho-p90RSK<sub>Ser359</sub> (8753), REV-ERB<sub>α</sub> (13418), ULK1 (8054), Phospho-ULK1<sub>Ser555</sub> (5869),  
810 all diluted 1:1000; from Santa Cruz: C/EBP<sub>α</sub> (SC-365318, 1:500); from Abcam: BMAL1  
811 (Ab3350, 1:1000); from Alpha Diagnostics International: PER2 (PER21-A 1:2000); from Bethyl  
812 Laboratories: CRY1 (A302-614A 1:1000); from Sigma: α-Tubulin (T5168, 1:80000); from

813 Genetex: GAPDH-HRP (GTX627408-01, 1:120000) and P84 (GTX70220-01, 1:1000) The  
814 secondary antibodies were Anti-rabbit IgG (Cell Signaling, 7074, 1:150000 for BMAL1,  
815 1:10000 for Ppar $\gamma$  and 1:80000 for the rest) or Anti-mouse IgG (Sigma I8765, 1:80000),  
816 conjugated to horseradish peroxidase. For detection, the Immobilon Western  
817 Chemiluminescent HRP Substrate (Millipore, cat. no. WBKLS0100) was used and  
818 luminescence was visualized and documented in a Gel Logic 1500 Imaging System (KODAK).  
819 Protein bands were quantified by densitometric analysis using Image Studio Lite Version 5.0  
820 software (LI-COR biosciences). 4-5 biological replicates were used for each quantification.

### 821 **Chromatin immunoprecipitation (ChIP)**

822 100-200 mg of liver tissue were homogenized with a pestle in PBS. Dual crosslinking was  
823 performed in a final volume of 1ml using 2 mM of DSG (Disuccinimidyl glutarate, ProteoChem,  
824 CAS: 79642-50-5) for 10 min at RT on a rotary shaker. DSG was washed out and a second  
825 crosslink was performed using 1% formaldehyde (Sigma-Aldrich, F8775) in PBS for 15 min at  
826 RT on a rotary shaker. Crosslinking was stopped with 0.125 M glycine for 5 min at 4°C. After  
827 two washes with ice-cold PBS, nuclei were isolated by resuspending the tissue in 600  $\mu$ L of  
828 ice-cold nuclei preparation buffer (NPB: 10 mM HEPES, 10 mM KCl, 1.5 mM MgCl<sub>2</sub>, 250 mM  
829 sucrose, 0.1% IGEPAL CA-630) and incubating at 4°C for 5 min in rotation. Nuclei were  
830 collected by centrifugation at 1,500g for 12 min at 4°C and, and resuspended in 600  $\mu$ L of cold  
831 nuclear lysis buffer (10 mM Tris pH 8, 1 mM EDTA, 0.5 mM EGTA, 0.3% SDS, 1X cComplete™  
832 Protease Inhibitor Cocktail, Roche) for 30 min on ice. Nuclear lysates were stored at -80°C.  
833 300  $\mu$ L of lysates were sonicated using a Bioruptor Pico Sonicator (Diagenode) for 15 cycles  
834 (30 s ON/30 s OFF). Chromatin fragments (100-500 bp) were evaluated on agarose gels using  
835 10  $\mu$ L of sonicated chromatin for DNA purification using the phenol method. 600  $\mu$ L of ice-cold

836 ChIP-dilution buffer (1% Triton X-100, 2 mM EDTA, 20 mM Tris pH 8, 150 mM NaCl, 1 mM  
837 PMSF, 1X cOmplete™ Protease Inhibitor Cocktail, Roche) was added to the fragmented  
838 chromatin, and 10% volume was recovered as the Input. Immunoprecipitation was set up  
839 overnight at 4°C, by adding 20 µL of magnetic beads (Magna ChIP Protein G Magnetic Beads  
840 C #16-662, Sigma-Aldrich) and a combination of two anti BMAL1 antibodies: 1.25 µL rabbit  
841 anti-BMAL1 (ab3350, Abcam) and 2.5 µL rabbit anti-BMAL1 (ab93806, Abcam).  
842 Immunoprecipitations with 4 µL of normal mouse IgG (Sigma-Aldrich, Cat. No. 18765) were  
843 performed simultaneously. Sequential washes of the magnetic beads were performed for 10  
844 min at 4°C, as follows: Wash buffer 1 (20 mM Tris pH 8, 0.1% SDS, 1% Triton X-100, 150 mM  
845 NaCl, 2 mM EDTA), Wash buffer 2 (20 mM Tris pH 8, 0.1% SDS, 1% Triton X-100, 500 mM  
846 NaCl, 2 mM EDTA), Wash buffer 3 (10 mM Tris pH 8, 250 mM LiCl, 1% IGEPAL CA-630, 1%  
847 sodium deoxycolate) and TE buffer (10 mM Tris pH 8, 1 mM EDTA). Chromatin was eluted by  
848 adding 400 µL of fresh elution buffer (10 mM Tris pH 8, 0.5% SDS, 300 mM NaCl, 5 mM  
849 EDTA, 0.05 mg/mL proteinase K) to the magnetic beads and incubating overnight at 65°C. A  
850 treatment with RNase A at 0.1 mg/ml for 30 min at 37 °C was performed. The DNA was purified  
851 from the IPs and Inputs by adding one volume of phenol:chloroform:isoamyl alcohol  
852 (25:24:1). After mixing and centrifugation, the aqueous phase was recovered, and DNA was  
853 precipitated by adding 1/10 volumes of sodium acetate (0.3 M pH 5.2), 20 µg of glycogen  
854 (10901393001, Roche) and 2 volumes of ice-cold ethanol, at -80°C overnight. DNA was  
855 pelleted by centrifugation at 13500 rpm for 30 min at 4°C. The DNA was washed with 70%  
856 ethanol, and resuspended in 50 µL of molecular grade water. 1.5 µl were used for subsequent  
857 qRT-PCR reactions with specific primers designed using Primer3web, within regulatory regions

858 previously identified as BMAL1 binding sites in mouse liver, as reported in the ChIP-Atlas  
859 database<sup>153</sup>. Primer sequences are available in Supplementary Table S4.

## 860 **Assessment of locomotor behavior**

861 Mice were individually housed in a light-tight, ventilated cabinet, under a 12h light:12h dark  
862 cycle, and ad libitum access to food and water. At the appropriate time for each treatment,  
863 animals were removed from their cages to receive IP injections for less than 2 minutes each.  
864 Cages were equipped with two infrared motion sensors (OASPAD system, OMNIALVA). Beam  
865 break data was continuously recorded and compiled with the OASPAD20 (OMNIALVA)  
866 software, and files containing the number of beam breaks per 6-minute bin were exported.  
867 Double-plotted actograms were generated using RhythmicAlly<sup>154</sup>. Activity profiles were  
868 obtained averaging 5 consecutive days prior to the NAD<sup>+</sup> treatment, and 5 consecutive days  
869 after the start of the treatment. Activity profile data from 30 minutes were averaged for  
870 statistical comparisons.

## 871 **Statistical analyses**

872 All data was presented as the mean  $\pm$  standard error of the mean, and two-way analysis of  
873 variance (ANOVA) followed by Tukey's test for multiple comparisons was used for statistical  
874 analyses except when otherwise noted in the figure legends. Differences between groups were  
875 rated as statistically significant at  $P < 0.05$ . GraphPad Prism version 5.0 for Windows  
876 (GraphPad Software Inc., San Diego, CA, USA) and Excel (Microsoft Office 360) were used for  
877 statistical analyses and plotting. 24-hours period rhythms were assessed employing CircWave  
878 version 1.4<sup>155</sup>, CircWave uses a forward linear harmonic regression to calculate the profile of  
879 the wave fitted into a 24h period. Daily rhythms were confirmed when the null amplitude  
880 hypothesis was rejected by running an  $F$  test that produced a significant value ( $P < 0.05$ ).

881 CircWave provides the calculation of the Centre of Gravity (CoG), representing the acrophase  
882 of the curve, with SD. Double-plotted data (ZT24) for visualization purposes are indicated in  
883 figure legends, and were not included in the statistical analyses. Figures were assembled  
884 using Adobe Illustrator CC 2015 (Adobe Inc., San José, CA, USA).

885 **Data availability:** All data generated or analyzed during this study are included in this article  
886 (and its supplementary information files). Source data are provided with this paper. All gene  
887 expression data that support the findings of this study have been deposited in the National  
888 Center for Biotechnology Information Gene Expression Omnibus (GEO) and are accessible  
889 through the GEO Series accession number: GSE163865.

890

## 891 REFERENCES

- 892 1 Blüher, M. Obesity: global epidemiology and pathogenesis. *Nature Reviews Endocrinology* **15**, 288-298,  
893 (2019).
- 894 2 Kahn, S. E., Cooper, M. E. & Del Prato, S. Pathophysiology and treatment of type 2 diabetes: perspectives  
895 on the past, present, and future. *Lancet* **383**, 1068-1083, (2014).
- 896 3 Heymsfield, S. B. & Wadden, T. A. Mechanisms, Pathophysiology, and Management of Obesity. *New*  
897 *England Journal of Medicine* **376**, 254-266, (2017).
- 898 4 Peeples, L. Medicine's secret ingredient - it's in the timing. *Nature* **556**, 290-292, (2018).
- 899 5 Kathale, N. D. & Liu, A. C. Prevalence of cycling genes and drug targets calls for prospective  
900 chronotherapeutics. *Proceedings of the National Academy of Sciences* **111**, 15869-15870, (2014).
- 901 6 Zhang, R., Lahens, N. F., Ballance, H. I., Hughes, M. E. & Hogenesch, J. B. A circadian gene expression  
902 atlas in mammals: Implications for biology and medicine. *Proceedings of the National Academy of*  
903 *Sciences* **111**, 16219-16224, (2014).
- 904 7 Ruben, M. D., Smith, D. F., FitzGerald, G. A. & Hogenesch, J. B. Dosing time matters. *Science* **365**, 547-  
905 549, (2019).
- 906 8 Münch, M. & Kramer, A. Timing matters: New tools for personalized chronomedicine and circadian  
907 health. *Acta Physiologica* **227**, e13300, (2019).
- 908 9 Dibner, C., Schibler, U. & Albrecht, U. The Mammalian Circadian Timing System: Organization and  
909 Coordination of Central and Peripheral Clocks. *Annual Review of Physiology* **72**, 517-549, (2010).
- 910 10 Crnko, S., Du Pré, B. C., Sluijter, J. P. G. & Van Laake, L. W. Circadian rhythms and the molecular clock in  
911 cardiovascular biology and disease. *Nature Reviews Cardiology* **16**, 437-447, (2019).
- 912 11 Qian, J. & Scheer, F. A. J. L. Circadian System and Glucose Metabolism: Implications for Physiology and  
913 Disease. *Trends in Endocrinology & Metabolism* **27**, 282-293, (2016).



- 914 12 Zimmet, P. *et al.* The Circadian Syndrome: is the Metabolic Syndrome and much more! *J Intern Med* **286**,  
915 181-191, (2019).
- 916 13 Takahashi, J. S. Transcriptional architecture of the mammalian circadian clock. *Nature Reviews Genetics*  
917 **18**, 164-179, (2017).
- 918 14 Pacheco-Bernal, I., Becerril-Pérez, F. & Aguilar-Arnal, L. Circadian rhythms in the three-dimensional  
919 genome: implications of chromatin interactions for cyclic transcription. *Clinical epigenetics* **11**, 79,  
920 (2019).
- 921 15 Dyar, K. A. *et al.* Atlas of Circadian Metabolism Reveals System-wide Coordination and Communication  
922 between Clocks. *Cell* **174**, 1571-1585.e1511, (2018).
- 923 16 Eckel-Mahan, K. L. *et al.* Reprogramming of the circadian clock by nutritional challenge. *Cell* **155**, 1464-  
924 1478, (2013).
- 925 17 Hatori, M. *et al.* Time-Restricted Feeding without Reducing Caloric Intake Prevents Metabolic Diseases in  
926 Mice Fed a High-Fat Diet. *Cell metabolism* **15**, 848-860, (2012).
- 927 18 Dallmann, R., Viola, A. U., Tarokh, L., Cajochen, C. & Brown, S. A. The human circadian metabolome.  
928 *Proceedings of the National Academy of Sciences* **109**, 2625-2629, (2012).
- 929 19 Nakahata, Y., Sahar, S., Astarita, G., Kaluzova, M. & Sassone-Corsi, P. Circadian control of the NAD+  
930 salvage pathway by CLOCK-SIRT1. *Science* **324**, 654-657, (2009).
- 931 20 Ramsey, K. M. *et al.* Circadian clock feedback cycle through NAMPT-mediated NAD+ biosynthesis.  
932 *Science* **324**, 651-654, (2009).
- 933 21 Peek, C. B. *et al.* Circadian clock NAD+ cycle drives mitochondrial oxidative metabolism in mice. *Science*  
934 **342**, 1243417-1243417, (2013).
- 935 22 Jacobi, D. *et al.* Hepatic Bmal1 Regulates Rhythmic Mitochondrial Dynamics and Promotes Metabolic  
936 Fitness. *Cell metabolism* **22**, 709-720, (2015).
- 937 23 Neufeld-Cohen, A. *et al.* Circadian control of oscillations in mitochondrial rate-limiting enzymes and  
938 nutrient utilization by PERIOD proteins. *Proceedings of the National Academy of Sciences* **113**, E1673-  
939 E1682, (2016).
- 940 24 Scrima, R. *et al.* Clock-genes and mitochondrial respiratory activity: Evidence of a reciprocal interplay.  
941 *Biochimica et Biophysica Acta (BBA) - Bioenergetics* **1857**, 1344-1351, (2016).
- 942 25 de Goede, P., Wefers, J., Brombacher, E. C., Schrauwen, P. & Kalsbeek, A. Circadian rhythms in  
943 mitochondrial respiration. *J Mol Endocrinol* **60**, R115-R130, (2018).
- 944 26 Koronowski, K. B. *et al.* Defining the Independence of the Liver Circadian Clock. *Cell* **177**, 1448-  
945 1462.e1414, (2019).
- 946 27 Sato, S. *et al.* Circadian Reprogramming in the Liver Identifies Metabolic Pathways of Aging. *Cell* **170**,  
947 664-677.e611, (2017).
- 948 28 Reinke, H. & Asher, G. Crosstalk between metabolism and circadian clocks. *Nature Reviews Molecular*  
949 *Cell Biology* **20**, 227-241, (2019).
- 950 29 Yang, Y. & Sauve, A. A. NAD(+) metabolism: Bioenergetics, signaling and manipulation for therapy.  
951 *Biochimica et biophysica acta* **1864**, 1787-1800, (2016).
- 952 30 Bogan, K. L. & Brenner, C. Nicotinic acid, nicotinamide, and nicotinamide riboside: a molecular  
953 evaluation of NAD+ precursor vitamins in human nutrition. *Annual review of nutrition* **28**, 115-130,  
954 (2008).
- 955 31 Teodoro, J. S., Rolo, A. P. & Palmeira, C. M. The NAD ratio redox paradox: why does too much reductive  
956 power cause oxidative stress? *Toxicology mechanisms and methods* **23**, 297-302, (2013).
- 957 32 Gariani, K. *et al.* Eliciting the mitochondrial unfolded protein response by nicotinamide adenine  
958 dinucleotide repletion reverses fatty liver disease in mice. *Hepatology* **63**, 1190-1204, (2016).
- 959 33 Gulshan, M. *et al.* Overexpression of Nmnat3 efficiently increases NAD and NGD levels and ameliorates  
960 age-associated insulin resistance. *Aging Cell* **17**, e12798, (2018).

- 961 34 Liu, S., Kim, T.-H., Franklin, D. A. & Zhang, Y. Protection against High-Fat-Diet-Induced Obesity in  
962 MDM2<sup>C305F</sup> Mice Due to Reduced p53 Activity and Enhanced Energy Expenditure. *Cell*  
963 *Reports* **18**, 1005-1018, (2017).
- 964 35 Trammell, S. A. J. *et al.* Nicotinamide Riboside Opposes Type 2 Diabetes and Neuropathy in Mice.  
965 *Scientific Reports* **6**, 26933, (2016).
- 966 36 Yoshino, J., Mills, K. F., Yoon, M. J. & Imai, S. Nicotinamide mononucleotide, a key NAD(+) intermediate,  
967 treats the pathophysiology of diet- and age-induced diabetes in mice. *Cell metabolism* **14**, 528-536,  
968 (2011).
- 969 37 Jukarainen, S. *et al.* Obesity is associated with low NAD<sup>+</sup>/SIRT pathway expression in adipose tissue of  
970 BMI-discordant monozygotic twins. *The Journal of Clinical Endocrinology* **101**, 275-283, (2016).
- 971 38 Matasic, D. S., Brenner, C. & London, B. Emerging potential benefits of modulating NAD(+) metabolism  
972 in cardiovascular disease. *American journal of physiology. Heart and circulatory physiology* **314**, H839-  
973 H852, (2018).
- 974 39 Zapata-Perez, R., Wanders, R. J. A., van Karnebeek, C. D. M. & Houtkooper, R. H. NAD(+) homeostasis in  
975 human health and disease. *EMBO molecular medicine* **13**, e13943, (2021).
- 976 40 Cantó, C. *et al.* The NAD<sup>+</sup> precursor nicotinamide riboside enhances oxidative metabolism and protects  
977 against high-fat diet-induced obesity. *Cell metabolism* **15**, 838-847, (2012).
- 978 41 Mitchell, S. J. *et al.* Nicotinamide Improves Aspects of Healthspan, but Not Lifespan, in Mice. *Cell*  
979 *metabolism* **27**, 667-676.e664, (2018).
- 980 42 Pham, T. X. *et al.* Nicotinamide riboside, an NAD<sup>+</sup> precursor, attenuates the development of liver fibrosis  
981 in a diet-induced mouse model of liver fibrosis. *Biochimica et Biophysica Acta (BBA) - Molecular Basis of*  
982 *Disease* **1865**, 2451-2463, (2019).
- 983 43 Sambeat, A. *et al.* Endogenous nicotinamide riboside metabolism protects against diet-induced liver  
984 damage. *Nature Communications* **10**, 4291, (2019).
- 985 44 Zhou, C.-C. *et al.* Hepatic NAD<sup>+</sup> deficiency as a therapeutic target for non-alcoholic fatty liver disease in  
986 ageing. *British Journal of Pharmacology* **173**, 2352-2368, (2016).
- 987 45 Yoshino, M. *et al.* Nicotinamide mononucleotide increases muscle insulin sensitivity in prediabetic  
988 women. *Science* **372**, 1224-1229, (2021).
- 989 46 Levine, D. C. *et al.* NAD<sup>+</sup> Controls Circadian Reprogramming through PER2 Nuclear Translocation to  
990 Counter Aging. *Molecular Cell* **78**, 835-849.e837, (2020).
- 991 47 Kohsaka, A. *et al.* High-fat diet disrupts behavioral and molecular circadian rhythms in mice. *Cell*  
992 *metabolism* **6**, 414-421, (2007).
- 993 48 Orozco-Solis, R. *et al.* The Circadian Clock in the Ventromedial Hypothalamus Controls Cyclic Energy  
994 Expenditure. *Cell metabolism* **23**, 467-478, (2016).
- 995 49 Stenvers, D. J., Scheer, F., Schrauwen, P., la Fleur, S. E. & Kalsbeek, A. Circadian clocks and insulin  
996 resistance. *Nature Reviews Endocrinology* **15**, 75-89, (2019).
- 997 50 Lefterova, M. I., Haakonsson, A. K., Lazar, M. A. & Mandrup, S. PPAR $\gamma$  and the global map of  
998 adipogenesis and beyond. *Trends in endocrinology and metabolism: TEM* **25**, 293-302, (2014).
- 999 51 Rosen, E. D. *et al.* C/EBP $\alpha$  induces adipogenesis through PPAR $\gamma$ : a unified pathway. *Genes &*  
1000 *development* **16**, 22-26, (2002).
- 1001 52 Clarke, S. L., Robinson, C. E. & Gimble, J. M. CAAT/enhancer binding proteins directly modulate  
1002 transcription from the peroxisome proliferator-activated receptor gamma 2 promoter. *Biochemical and*  
1003 *biophysical research communications* **240**, 99-103, (1997).
- 1004 53 Krishnaiah, S. Y. *et al.* Clock Regulation of Metabolites Reveals Coupling between Transcription and  
1005 Metabolism. *Cell metabolism* **25**, 961-974.e964, (2017).
- 1006 54 Subramanian, A. *et al.* Gene set enrichment analysis: A knowledge-based approach for interpreting  
1007 genome-wide expression profiles. *Proceedings of the National Academy of Sciences* **102**, 15545-15550,  
1008 (2005).

- 1009 55 Cai, D. *et al.* Local and systemic insulin resistance resulting from hepatic activation of IKK-beta and NF-  
1010 kappaB. *Nature medicine* **11**, 183-190, (2005).
- 1011 56 Asrih, M. & Jornayvaz, F. R. Inflammation as a potential link between nonalcoholic fatty liver disease and  
1012 insulin resistance. *Journal of Endocrinology* **218**, R25, (2013).
- 1013 57 Bochkis, I. M. *et al.* Hepatocyte-specific ablation of Foxa2 alters bile acid homeostasis and results in  
1014 endoplasmic reticulum stress. *Nature medicine* **14**, 828-836, (2008).
- 1015 58 Wolfrum, C., Asilmaz, E., Luca, E., Friedman, J. M. & Stoffel, M. Foxa2 regulates lipid metabolism and  
1016 ketogenesis in the liver during fasting and in diabetes. *Nature* **432**, 1027-1032, (2004).
- 1017 59 Manning, B. D. & Toker, A. AKT/PKB Signaling: Navigating the Network. *Cell* **169**, 381-405, (2017).
- 1018 60 Vollmers, C. *et al.* Time of feeding and the intrinsic circadian clock drive rhythms in hepatic gene  
1019 expression. *Proceedings of the National Academy of Sciences* **106**, 21453-21458, (2009).
- 1020 61 Lamia, K. A. *et al.* AMPK regulates the circadian clock by cryptochrome phosphorylation and  
1021 degradation. *Science* **326**, 437-440, (2009).
- 1022 62 Mihaylova, M. M. & Shaw, R. J. The AMPK signalling pathway coordinates cell growth, autophagy and  
1023 metabolism. *Nature Cell Biology* **13**, 1016-1023, (2011).
- 1024 63 Robles, M. S., Humphrey, S. J. & Mann, M. Phosphorylation Is a Central Mechanism for Circadian Control  
1025 of Metabolism and Physiology. *Cell metabolism* **25**, 118-127, (2017).
- 1026 64 Jouffe, C. *et al.* The Circadian Clock Coordinates Ribosome Biogenesis. *PLOS Biology* **11**, e1001455,  
1027 (2013).
- 1028 65 Roux, P. P. & Topisirovic, I. Regulation of mRNA translation by signaling pathways. *Cold Spring Harb*  
1029 *Perspect Biol* **4**, a012252, (2012).
- 1030 66 Carrière, A. *et al.* Oncogenic MAPK Signaling Stimulates mTORC1 Activity by Promoting RSK-Mediated  
1031 Raptor Phosphorylation. *Current Biology* **18**, 1269-1277, (2008).
- 1032 67 Hutagalung, A. H. & Novick, P. J. Role of Rab GTPases in membrane traffic and cell physiology. *Physiol*  
1033 *Rev* **91**, 119-149, (2011).
- 1034 68 Zoppino, F. C., Militello, R. D., Slavin, I., Alvarez, C. & Colombo, M. I. Autophagosome formation depends  
1035 on the small GTPase Rab1 and functional ER exit sites. *Traffic (Copenhagen, Denmark)* **11**, 1246-1261,  
1036 (2010).
- 1037 69 Hyttinen, J. M. T., Niittykoski, M., Salminen, A. & Kaarniranta, K. Maturation of autophagosomes and  
1038 endosomes: A key role for Rab7. *Biochimica et Biophysica Acta (BBA) - Molecular Cell Research* **1833**,  
1039 503-510, (2013).
- 1040 70 Ao, X., Zou, L. & Wu, Y. Regulation of autophagy by the Rab GTPase network. *Cell Death &*  
1041 *Differentiation* **21**, 348-358, (2014).
- 1042 71 Li, Z. *et al.* A novel Rab10-EHBP1-EHD2 complex essential for the autophagic engulfment of lipid  
1043 droplets. *Science advances* **2**, e1601470-e1601470, (2016).
- 1044 72 Ayala, C. I., Kim, J. & Neufeld, T. P. Rab6 promotes insulin receptor and cathepsin trafficking to regulate  
1045 autophagy induction and activity in *Drosophila*. *J Cell Sci* **131**, jcs216127, (2018).
- 1046 73 Sun, Y., Bilan, P. J., Liu, Z. & Klip, A. Rab8A and Rab13 are activated by insulin and regulate GLUT4  
1047 translocation in muscle cells. *Proc Natl Acad Sci U S A* **107**, 19909-19914, (2010).
- 1048 74 Chong, C.-M. *et al.* Presenilin 1 deficiency suppresses autophagy in human neural stem cells through  
1049 reducing  $\gamma$ -secretase-independent ERK/CREB signaling. *Cell Death & Disease* **9**, 879, (2018).
- 1050 75 Wolf, E. *et al.* Miz1 is required to maintain autophagic flux. *Nature Communications* **4**, 2535, (2013).
- 1051 76 Xiong, Q. *et al.* Nr2e1 ablation impairs liver glucolipid metabolism and induces inflammation, high-fat  
1052 diets amplify the damage. *Biomedicine & Pharmacotherapy* **120**, 109503, (2019).
- 1053 77 Hayhurst, G. P., Lee, Y. H., Lambert, G., Ward, J. M. & Gonzalez, F. J. Hepatocyte nuclear factor 4alpha  
1054 (nuclear receptor 2A1) is essential for maintenance of hepatic gene expression and lipid homeostasis.  
1055 *Molecular and cellular biology* **21**, 1393-1403, (2001).

- 1056 78 Zhan, Y.-y. *et al.* The orphan nuclear receptor Nur77 regulates LKB1 localization and activates AMPK. *Nature Chemical Biology* **8**, 897-904, (2012).  
1057  
1058 79 Thomas, D. D., Corkey, B. E., Istfan, N. W. & Apovian, C. M. Hyperinsulinemia: An Early Indicator of  
1059 Metabolic Dysfunction. *Journal of the Endocrine Society* **3**, 1727-1747, (2019).  
1060 80 Lavigne, P. M. & Karas, R. H. The Current State of Niacin in Cardiovascular Disease Prevention: A  
1061 Systematic Review and Meta-Regression. *Journal of the American College of Cardiology* **61**, 440-446,  
1062 (2013).  
1063 81 Romani, M., Hofer, D. C., Katsyuba, E. & Auwerx, J. Niacin: an old lipid drug in a new NAD(+) dress. *J Lipid*  
1064 *Res* **60**, 741-746, (2019).  
1065 82 Merrill, G. F., Kurth, E. J., Hardie, D. G. & Winder, W. W. AICA riboside increases AMP-activated protein  
1066 kinase, fatty acid oxidation, and glucose uptake in rat muscle. *The American journal of physiology* **273**,  
1067 E1107-1112, (1997).  
1068 83 Yoshino, J., Baur, J. A. & Imai, S. I. NAD(+) Intermediates: The Biology and Therapeutic Potential of NMN  
1069 and NR. *Cell metabolism* **27**, 513-528, (2018).  
1070 84 Guan, D. *et al.* Diet-Induced Circadian Enhancer Remodeling Synchronizes Opposing Hepatic Lipid  
1071 Metabolic Processes. *Cell* **174**, 831-842.e812, (2018).  
1072 85 Beattie, J. H. *et al.* Obesity and hyperleptinemia in metallothionein (-I and -II) null mice. *Proceedings of*  
1073 *the National Academy of Sciences* **95**, 358-363, (1998).  
1074 86 Sato, M. *et al.* Development of high-fat-diet-induced obesity in female metallothionein-null mice. *The*  
1075 *FASEB Journal* **24**, 2375-2384, (2010).  
1076 87 Swindell, W. R. Metallothionein and the biology of aging. *Ageing Research Reviews* **10**, 132-145, (2011).  
1077 88 Xu, Y. *et al.* Lipocalin-2 Protects Against Diet-Induced Nonalcoholic Fatty Liver Disease by Targeting  
1078 Hepatocytes. *Hepatology Communications* **3**, 763-775, (2019).  
1079 89 Rutter, J., Reick, M., Wu, L. C. & McKnight, S. L. Regulation of clock and NPAS2 DNA binding by the redox  
1080 state of NAD cofactors. *Science* **293**, 510-514, (2001).  
1081 90 Koike, N. *et al.* Transcriptional architecture and chromatin landscape of the core circadian clock in  
1082 mammals. *Science* **338**, 349-354, (2012).  
1083 91 Damiola, F. *et al.* Restricted feeding uncouples circadian oscillators in peripheral tissues from the central  
1084 pacemaker in the suprachiasmatic nucleus. *Genes & development* **14**, 2950-2961, (2000).  
1085 92 Saini, C. *et al.* Real-time recording of circadian liver gene expression in freely moving mice reveals the  
1086 phase-setting behavior of hepatocyte clocks. *Genes & development* **27**, 1526-1536, (2013).  
1087 93 de Guia, R. M. *et al.* Fasting- and ghrelin-induced food intake is regulated by NAMPT in the  
1088 hypothalamus. *Acta Physiol (Oxf)* **228**, e13437, (2020).  
1089 94 Roh, E. *et al.* Effects of Chronic NAD Supplementation on Energy Metabolism and Diurnal Rhythm in  
1090 Obese Mice. *Obesity* **26**, 1448-1456, (2018).  
1091 95 Schein, P. S. & Loftus, S. Streptozotocin: depression of mouse liver pyridine nucleotides. *Cancer research*  
1092 **28**, 1501-1506, (1968).  
1093 96 Rajman, L., Chwalek, K. & Sinclair, D. A. Therapeutic Potential of NAD-Boosting Molecules: The  
1094 *In Vivo* Evidence. *Cell metabolism* **27**, 529-547, (2018).  
1095 97 Belenky, P., Bogan, K. L. & Brenner, C. NAD<sup>+</sup> metabolism in health and disease. *Trends in Biochemical*  
1096 *Sciences* **32**, 12-19, (2007).  
1097 98 Bieganowski, P. & Brenner, C. Discoveries of Nicotinamide Riboside as a Nutrient and Conserved NRK  
1098 Genes Establish a Preiss-Handler Independent Route to NAD<sup>+</sup> in Fungi and Humans. *Cell* **117**, 495-502,  
1099 (2004).  
1100 99 Ratajczak, J. *et al.* NRK1 controls nicotinamide mononucleotide and nicotinamide riboside metabolism in  
1101 mammalian cells. *Nat Commun* **7**, 13103, (2016).

- 1102 100 Nikiforov, A., Dolle, C., Niere, M. & Ziegler, M. Pathways and subcellular compartmentation of NAD  
1103 biosynthesis in human cells: from entry of extracellular precursors to mitochondrial NAD generation. *The*  
1104 *Journal of biological chemistry* **286**, 21767-21778, (2011).
- 1105 101 Liu, L. *et al.* Quantitative Analysis of NAD Synthesis-Breakdown Fluxes. *Cell metabolism* **27**, 1067-  
1106 1080.e1065, (2018).
- 1107 102 Kory, N. *et al.* MCART1/SLC25A51 is required for mitochondrial NAD transport. *Science Advances* **6**,  
1108 eabe5310, (2020).
- 1109 103 Luongo, T. S. *et al.* SLC25A51 is a mammalian mitochondrial NAD<sup>+</sup> transporter. *Nature*, (2020).
- 1110 104 Aguilar-Arnal, L. *et al.* Spatial dynamics of SIRT1 and the subnuclear distribution of NADH species.  
1111 *Proceedings of the National Academy of Sciences* **113**, 12715-12720, (2016).
- 1112 105 Billington, R. A. *et al.* Characterization of NAD uptake in mammalian cells. *The Journal of biological*  
1113 *chemistry* **283**, 6367-6374, (2008).
- 1114 106 Rey, G. *et al.* The Pentose Phosphate Pathway Regulates the Circadian Clock. *Cell metabolism* **24**, 462-  
1115 473, (2016).
- 1116 107 Caton, P. W., Kieswich, J., Yaqoob, M. M., Holness, M. J. & Sugden, M. C. Nicotinamide mononucleotide  
1117 protects against pro-inflammatory cytokine-mediated impairment of mouse islet function. *Diabetologia*  
1118 **54**, 3083-3092, (2011).
- 1119 108 Uddin, G. M., Youngson, N. A., Sinclair, D. A. & Morris, M. J. Head to Head Comparison of Short-Term  
1120 Treatment with the NAD(+) Precursor Nicotinamide Mononucleotide (NMN) and 6 Weeks of Exercise in  
1121 Obese Female Mice. *Frontiers in pharmacology* **7**, 258, (2016).
- 1122 109 Lee, H. J., Hong, Y. S., Jun, W. & Yang, S. J. Nicotinamide Riboside Ameliorates Hepatic Metaflammation  
1123 by Modulating NLRP3 Inflammasome in a Rodent Model of Type 2 Diabetes. *Journal of medicinal food*  
1124 **18**, 1207-1213, (2015).
- 1125 110 Mukherjee, S. *et al.* Nicotinamide adenine dinucleotide biosynthesis promotes liver regeneration.  
1126 *Hepatology* **65**, 616-630, (2017).
- 1127 111 Shi, W. *et al.* Effects of a wide range of dietary nicotinamide riboside (NR) concentrations on metabolic  
1128 flexibility and white adipose tissue (WAT) of mice fed a mildly obesogenic diet. *Molecular nutrition &*  
1129 *food research* **61**, (2017).
- 1130 112 Peng, C. *et al.* RSK2 mediates NF- $\kappa$ B activity through the phosphorylation of I $\kappa$ B $\alpha$  in the  
1131 TNF-R1 pathway. *FASEB J* **24**, 3490-3499, (2010).
- 1132 113 Shahbazian, D. *et al.* The mTOR/PI3K and MAPK pathways converge on eIF4B to control its  
1133 phosphorylation and activity. *The EMBO Journal* **25**, 2781-2791, (2006).
- 1134 114 González, A., Hall, M. N., Lin, S.-C. & Hardie, D. G. AMPK and TOR: The Yin and Yang of Cellular Nutrient  
1135 Sensing and Growth Control. *Cell metabolism* **31**, 472-492, (2020).
- 1136 115 Dalle Pezze, P. *et al.* A systems study reveals concurrent activation of AMPK and mTOR by amino acids.  
1137 *Nature Communications* **7**, 13254, (2016).
- 1138 116 Day, E. A., Ford, R. J. & Steinberg, G. R. AMPK as a Therapeutic Target for Treating Metabolic Diseases.  
1139 *Trends in endocrinology and metabolism: TEM* **28**, 545-560, (2017).
- 1140 117 Wong, Aaron K. F., Howie, J., Petrie, John R. & Lang, Chim C. AMP-activated protein kinase pathway: a  
1141 potential therapeutic target in cardiometabolic disease. *Clinical Science* **116**, 607-620, (2009).
- 1142 118 Lamia, K. A. *et al.* AMPK Regulates the Circadian Clock by Cryptochrome Phosphorylation and  
1143 Degradation. *Science* **326**, 437-440, (2009).
- 1144 119 Stokkan, K. A., Yamazaki, S., Tei, H., Sakaki, Y. & Menaker, M. Entrainment of the circadian clock in the  
1145 liver by feeding. *Science* **291**, 490-493, (2001).
- 1146 120 Aguilar-Arnal, L., Katada, S., Orozco-Solis, R. & Sassone-Corsi, P. NAD(+)-SIRT1 control of H3K4  
1147 trimethylation through circadian deacetylation of MLL1. *Nature structural & molecular biology* **22**, 312-  
1148 318, (2015).

- 1149 121 Fang, B. *et al.* Circadian Enhancers Coordinate Multiple Phases of Rhythmic Gene Transcription  
1150 In Vivo. *Cell* **159**, 1140-1152, (2014).
- 1151 122 Bruce, K. D., Zsombok, A. & Eckel, R. H. Lipid Processing in the Brain: A Key Regulator of Systemic  
1152 Metabolism. *Frontiers in Endocrinology* **8**, (2017).
- 1153 123 Menet, J. S., Pescatore, S. & Rosbash, M. CLOCK:BMAL1 is a pioneer-like transcription factor. *Genes &*  
1154 *development* **28**, 8-13, (2014).
- 1155 124 Rey, G. *et al.* Genome-Wide and Phase-Specific DNA-Binding Rhythms of BMAL1 Control Circadian  
1156 Output Functions in Mouse Liver. *PLoS Biology* **9**, e1000595, (2011).
- 1157 125 Qu, M., Qu, H., Jia, Z. & Kay, S. A. HNF4A defines tissue-specific circadian rhythms by beaconing  
1158 BMAL1::CLOCK chromatin binding and shaping the rhythmic chromatin landscape. *Nature*  
1159 *Communications* **12**, 6350, (2021).
- 1160 126 Beytebiere, J. R. *et al.* Tissue-specific BMAL1 cistromes reveal that rhythmic transcription is associated  
1161 with rhythmic enhancer–enhancer interactions. *Genes & development* **33**, 294-309, (2019).
- 1162 127 Katsyuba, E., Romani, M., Hofer, D. & Auwerx, J. NAD<sup>+</sup> homeostasis in health and disease. *Nature*  
1163 *Metabolism* **2**, 9-31, (2020).
- 1164 128 Asher, G. *et al.* SIRT1 Regulates Circadian Clock Gene Expression through PER2 Deacetylation. *Cell* **134**,  
1165 317-328, (2008).
- 1166 129 Nakahata, Y. *et al.* The NAD<sup>+</sup>-dependent deacetylase SIRT1 modulates CLOCK-mediated chromatin  
1167 remodeling and circadian control. *Cell* **134**, 329-340, (2008).
- 1168 130 Picard, F. *et al.* Sirt1 promotes fat mobilization in white adipocytes by repressing PPAR-gamma. *Nature*  
1169 **429**, 771-776, (2004).
- 1170 131 Baron, K. G. & Reid, K. J. Circadian misalignment and health. *International review of psychiatry* **26**, 139-  
1171 154, (2014).
- 1172 132 Leproult, R., Holmback, U. & Van Cauter, E. Circadian misalignment augments markers of insulin  
1173 resistance and inflammation, independently of sleep loss. *Diabetes* **63**, 1860-1869, (2014).
- 1174 133 Wefers, J. *et al.* Circadian misalignment induces fatty acid metabolism gene profiles and compromises  
1175 insulin sensitivity in human skeletal muscle. *Proc Natl Acad Sci U S A* **115**, 7789-7794, (2018).
- 1176 134 Hara, R. *et al.* Restricted feeding entrains liver clock without participation of the suprachiasmatic  
1177 nucleus. *Genes to cells : devoted to molecular & cellular mechanisms* **6**, 269-278, (2001).
- 1178 135 Mukherji, A., Kobiita, A. & Chambon, P. Shifting the feeding of mice to the rest phase creates metabolic  
1179 alterations, which, on their own, shift the peripheral circadian clocks by 12 hours. *Proc Natl Acad Sci U S*  
1180 *A* **112**, E6683-6690, (2015).
- 1181 136 Huang, Q. *et al.* Combination of NAD(+) and NADPH Offers Greater Neuroprotection in Ischemic Stroke  
1182 Models by Relieving Metabolic Stress. **55**, 6063-6075, (2018).
- 1183 137 Roh, E. *et al.* Exogenous nicotinamide adenine dinucleotide regulates energy metabolism via  
1184 hypothalamic connexin 43. *Metabolism: clinical and experimental* **88**, 51-60, (2018).
- 1185 138 Covarrubias, A. J. *et al.* Senescent cells promote tissue NAD(+) decline during ageing via the activation of  
1186 CD38(+) macrophages. *Nat Metab* **2**, 1265-1283, (2020).
- 1187 139 Chini, C. C. S. *et al.* CD38 ecto-enzyme in immune cells is induced during aging and regulates NAD(+) and  
1188 NMN levels. *Nat Metab* **2**, 1284-1304, (2020).
- 1189 140 Droin, C. *et al.* Space-time logic of liver gene expression at sub-lobular scale. *Nat Metab* **3**, 43-58, (2021).
- 1190 141 Tullius, S. G. *et al.* NAD<sup>+</sup> protects against EAE by regulating CD4<sup>+</sup> T-cell differentiation. *Nat Commun* **5**,  
1191 5101, (2014).
- 1192 142 Wang, J. *et al.* Treatment with NAD(+) inhibited experimental autoimmune encephalomyelitis by  
1193 activating AMPK/SIRT1 signaling pathway and modulating Th1/Th17 immune responses in mice.  
1194 *International immunopharmacology* **39**, 287-294, (2016).
- 1195 143 Liu, B., Zhao, G., Jin, L. & Shi, J. Nicotinamide Improves Cognitive Function in Mice With Chronic Cerebral  
1196 Hypoperfusion. *Frontiers in neurology* **12**, 596641, (2021).

- 1197 144 Wang, C. *et al.* Nicotinamide Administration Improves Remyelination after Stroke. *Neural plasticity*  
1198 **2017**, 7019803, (2017).
- 1199 145 Zheng, M. *et al.* Nicotinamide reduces renal interstitial fibrosis by suppressing tubular injury and  
1200 inflammation. *Journal of cellular and molecular medicine* **23**, 3995-4004, (2019).
- 1201 146 Yoshino, J. & Imai, S. Accurate measurement of nicotinamide adenine dinucleotide (NAD(+)) with high-  
1202 performance liquid chromatography. *Methods in molecular biology* **1077**, 203-215, (2013).
- 1203 147 Mehlem, A., Hagberg, C. E., Muhl, L., Eriksson, U. & Falkevall, A. Imaging of neutral lipids by oil red O for  
1204 analyzing the metabolic status in health and disease. *Nature protocols* **8**, 1149-1154, (2013).
- 1205 148 Collins, T. J. ImageJ for microscopy. *BioTechniques* **43**, 25-30, (2007).
- 1206 149 Venegas, V., Wang, J., Dimmock, D. & Wong, L.-J. Real-Time Quantitative PCR Analysis of Mitochondrial  
1207 DNA Content. *Current Protocols in Human Genetics* **68**, 19.17.11-19.17.12, (2011).
- 1208 150 Liberzon, A. *et al.* The Molecular Signatures Database (MSigDB) hallmark gene set collection. *Cell*  
1209 *systems* **1**, 417-425, (2015).
- 1210 151 Heinz, S. *et al.* Simple combinations of lineage-determining transcription factors prime cis-regulatory  
1211 elements required for macrophage and B cell identities. *Molecular cell* **38**, 576-589, (2010).
- 1212 152 Colombo, G. *et al.* A step-by-step protocol for assaying protein carbonylation in biological samples.  
1213 *Journal of chromatography. B, Analytical technologies in the biomedical and life sciences* **1019**, 178-190,  
1214 (2016).
- 1215 153 Oki, S. *et al.* ChIP-Atlas: a data-mining suite powered by full integration of public ChIP-seq data. *EMBO*  
1216 *reports* **19**, e46255, (2018).
- 1217 154 Abhilash, L. & Sheeba, V. RhythmicAlly: Your R and Shiny-Based Open-Source Ally for the Analysis of  
1218 Biological Rhythms. *Journal of biological rhythms* **34**, 551-561, (2019).
- 1219 155 Hut, R. A. (<https://www.euclock.org/results/item/circ-wave.html>, 2015).

1220

## 1221 **ACKNOWLEDGEMENTS**

1222 We thank all members of Aguilar-Arnal and Orozco-Solis laboratories for helpful discussions  
1223 and advice. We thank Alicia González-Manjárrez, PhD, from the Instituto de Fisiología Celular,  
1224 UNAM, México, and Rudolf M. Buijs, PhD, from the Instituto de Investigaciones Biomédicas  
1225 (IIB), UNAM, México, for their suggestions and comments on this research. We thank Victor  
1226 Daniel Garzón Cortés, PhD, and the Unidad de Modelos Biológicos (UMB) at the IIB for their  
1227 support with animal care and maintenance. We are thankful to Dr. Alfonso Leon-del-Rio  
1228 laboratory at the IIB and particularly to Rafael Cervantes MSc, for kindly sharing reagents and  
1229 equipment. We also thank the Microarray Unit at the Instituto Nacional de Medicina Genómica  
1230 (INMEGEN, Mexico City) for assistance. We also thank to Alfonso González-Noriega, PhD, for  
1231 his generous gift of equipment, reagents, and laboratory space. Research in LA-A lab was

1232 supported by grants PAPIIT IA201717, IN210619 from Universidad Nacional Autónoma de  
1233 México (UNAM), the Early Career Return Grant CRP/MEX16-05\_EC from The International  
1234 Center for Genomic Engineering and Biotechnology (ICGEB), Human Frontiers Science  
1235 Program Young Investigators' Grant RGY0078/2017 and the National Council of Science and  
1236 Technology (CONACyT) FORDECYT-PRONACES/15758/2020. RO-S lab was supported by  
1237 CONACyT grants FC 2016/2672 and FOSISS 272757, and the INMEGEN (09/2017/I). QE-C  
1238 acknowledges the reception of PhD fellowship from CONACyT, and a fellowship from DGAPA-  
1239 PAPIIT IN210619. LM-V was a recipient of a postdoctoral fellowship from DGAPA-UNAM.

1240

#### 1241 **AUTHOR'S CONTRIBUTION:**

1242 LA-A and RO-S conceived and designed the study. QE-C designed and conducted all  
1243 experiments. LM-V, FB-P, IP-B, EC-V, PM-S, LA-A, RO-S, assisted with the *in vivo*  
1244 experiments and tissue collection. MG-S and LA-A performed CHIP experiments. LM-V and  
1245 MB-Z provided technical assistance. QE-C, LM-V, RO-S and LA-A analyzed and interpreted  
1246 the data. QE-C and LA-A wrote the manuscript. All authors reviewed the manuscript and  
1247 discussed the work.

1248

#### 1249 **COMPETING INTERESTS:**

1250 The authors declare that the research was conducted in the absence of any commercial or  
1251 financial relationships that could be construed as a potential conflict of interest.

1252

1253



1254 **Figure Legends**

1255 **Figure 1. A NAD<sup>+</sup> chronotherapy at ZT11 improves the pathophysiology of diet-induced**  
1256 **obesity.**

1257 **(A)** Schematic diagram of the study design. Mice were fed either a normocaloric diet (CD) or a  
1258 high-fat diet for 11 weeks. At week 8, a subgroup of high fat-fed mice was supplied a  
1259 chronotherapy with NAD<sup>+</sup>, consisting of a daily intraperitoneal injection of 50 mg/Kg of NAD<sup>+</sup> at  
1260 ZT11 for three weeks (HFN). The rest of the mice were injected with vehicle (saline solution).

1261 **(B)** Weekly body weight (n = 17- 20 mice per group). Red arrow indicates the period of  
1262 treatment with NAD<sup>+</sup> or saline at ZT11. **(C)** Hepatic NAD<sup>+</sup> content measured by HPLC along  
1263 the day at the indicated times for all groups after the experimental paradigm (n = 5-8 biological  
1264 replicates per time point, and 3 technical replicates). **(D)** Serum levels of insulin along the day  
1265 at indicated times (n = 5 biological replicates per time point, and 2 technical replicates). AUC:  
1266 area under the curve. **(E-H)** Glucose (E,F; GTT) and insulin (G,H; ITT) tolerance tests were  
1267 performed at both the rest (ZT4) and the active (ZT16) period at the indicated days (10 and 20)  
1268 after the beginning of treatments (n = 5-6 mice). AUC: area under the curve.

1269 CD: Control diet fed mice; HF: High-fat diet fed mice; HFN: High-fat diet fed, NAD<sup>+</sup> treated  
1270 mice at ZT11. Data represent mean ± SEM and were analyzed by two-way ANOVA using  
1271 Tukey posttest, except when comparing AUC, where one-way ANOVA followed by Tukey's  
1272 posttest was used. \* p <0.05, \*\* p <0.01, \*\*\* p <0.001. Points at ZT24 are duplicates of ZT0  
1273 replotted to show 24-h trends. Symbol key for comparisons: \* CD vs HF; + CD vs HFN; # HF  
1274 vs HFN. Data from live mice were replicated in two independent experiments. See also  
1275 complementary Figure S1.

1276

1277 **Figure 2. NAD<sup>+</sup> chronotherapy ameliorates NAFLD**

1278 **(A)** Representative hepatic histopathology. Upper panel: Oil-red-O stain (ORO). Lower panel:  
1279 Hematoxylin/Eosin. Images were acquired at 20X optical magnification, and a detailed 100X  
1280 digital magnification is shown **(B)** Quantification of ORO signal (arbitrary units). Signal for  
1281 control mice was set to 1 (n = 3 biological and 3 technical replicates). **(C)** The length of lipid  
1282 droplets was compared between groups (n = 3 biological and 3 technical replicates). **(D)**  
1283 Distribution of hepatic triglyceride content across the day (left), and comparisons from all  
1284 measurements (right) (n = 5 mice per time-point, with 2 technical replicates). **(E)** Protein  
1285 carbonyl levels (PCO) in liver lysates were measured at the indicated times of day (n = 5 mice  
1286 per time point, 2 technical replicates). AUC: area under the curve. **(F)** Relative mtDNA copies  
1287 of mtCO1 respect to 18S DNA measured by Real-time PCR (n = 5 biological and 2 technical  
1288 replicates). Inset area under the curve, content from CD group was set to 1. **(G)** Western blot  
1289 from PPAR $\gamma$ 1, 2 and CEBP $\alpha$  proteins in the mouse liver at the indicated times of day (ZT).  
1290 GAPDH was used as loading control (WB was performed from 3 biological replicates with  
1291 comparable results).

1292 CD: Control diet fed mice; HF: High-fat diet fed mice; HFN: High-fat diet fed, NAD<sup>+</sup> treated  
1293 mice at ZT11. Data represent mean  $\pm$  SEM and were analyzed by two-way ANOVA using  
1294 Tukey posttest, except for bar graphs, where one-way ANOVA followed by Tukey's posttest  
1295 was used. \* p <0.05, \*\* p <0.01, \*\*\* p <0.001. Symbol key for comparisons: \* CD vs HF; + CD  
1296 vs HFN; # HF vs HFN. See also complementary Figure S2.

1297 **Figure 3. Timed NAD<sup>+</sup> supply induce a reprogramming of hepatic transcripts DE**  
1298 **between day and night without altering the dynamics of clock proteins.**

1299 (A) Heatmaps of 76 common differentially expressed (DE) transcripts between day (ZT6) and  
1300 night (ZT18) in all groups. (B) Circadian protein expression of BMAL1, REV-ERB $\alpha$ , CRY1, and  
1301 PER2 in the whole cell extracts from CD, HF, and HFN livers was determined by western blot.  
1302 Tubulin or GAPDH were used as a loading control. (C) Quantification of western blots from n =  
1303 4 – 6 mice. Measurements were normalized to the loading control, and data from CD at ZT0  
1304 was set to 1. Means  $\pm$  SEM are presented. \*\*\*p < 0.001, Two-way ANOVA; n.s.: non  
1305 significant. Points at ZT24 are duplicates of ZT0 replotted to show 24-h trends. (D) Overlap of  
1306 DE transcripts between day (ZT6) and night (ZT18) in all groups (FDR<0.05; fold change  
1307 >1.3). (E) Heatmaps of distinct groups of DE transcripts between day (ZT6) and night (ZT18).  
1308 Left: 322 transcripts DE exclusively in CD; center: 1327 DE exclusively in HF; right: 306  
1309 transcripts DE exclusively in HFN (F) Shared biological processes for DE transcripts between  
1310 day and night from all groups. (G) Non-shared biological process for DE transcripts between  
1311 day and night. CD: Control diet fed mice; HF: High-fat diet fed mice; HFN: High-fat diet fed  
1312 mice, NAD<sup>+</sup> treated at ZT11.

1313 **Figure 4. A NAD<sup>+</sup> chronotherapy at ZT11 corrects abnormal gene and protein expression**  
1314 **from crucial molecular effectors of liver disease and triggers a specific transcriptional**  
1315 **signature.**

1316 (A, B) Overlap (A) and heatmap (B) of DE genes when comparing CD-HF and HF-HFN  
1317 groups either at day (ZT6) or ant night (ZT18) (n =3). (C, D) Functional annotation of CD-HF  
1318 and HF-HFN shared genes at daytime (C) or nighttime (D). (E) Homer *de novo* motif discovery  
1319 analyses from promoters of genes DE exclusively in the HF group. (F, G) Circadian protein  
1320 expression of AKT, p-AKT(S473), AMPK and p-AMPK(T172) (F) or the mTOR pathway (G) in  
1321 the whole cell extracts from CD, HF, and HFN livers was determined by western blot. Tubulin

1322 or p84 were used as a loading control. Images represent 3-4 independent experiments. **(H, I)**  
1323 Overlap **(H)** and heatmaps **(I)** of DE genes when comparing CD-HFN and HF-HFN groups  
1324 either at day (ZT6) or at night (ZT18) (n =3) **(J)** Functional annotation of shared genes DE in  
1325 analyses CD-HFN and HF-HFN at nighttime. **(K)** Homer *de novo* motif discovery analyses from  
1326 promoters of genes whose expression is altered exclusively in the HFN group.  
1327 CD: Control diet fed mice; HF: High-fat diet fed mice; HFN: High-fat diet fed, NAD<sup>+</sup> treated  
1328 mice at ZT11. See also Figure S3, S4 and Table S2.

1329 **Figure 5. Time-of-day dependent response to NAD<sup>+</sup> treatment in obese mice determines**  
1330 **the efficacy of the chronotherapy.**

1331 **(A)** Weekly body weight (n = 15 mice per group). Red arrow indicates the period of treatment  
1332 with NAD<sup>+</sup> or saline at ZT23. **(B)** Percent change in body weight between weeks 8 (just before  
1333 treatment), and 11 (end of the treatment) (n =18-24 mice per group). **(C)** Weekly food intake  
1334 from the indicated groups of mice is shown during three weeks before and after the NAD<sup>+</sup>  
1335 treatment (n=33 mice). **(D)** Serum levels of insulin measured at ZT6 (day) and ZT18 (night) (n  
1336 = 7-9 mice per time point). **(E, F)** Glucose (GTT) and insulin (ITT) tolerance tests were  
1337 performed during the light period (ZT4) at the indicated days before (day 0) and after (day 20)  
1338 NAD<sup>+</sup> treatment (n = 9-15 mice per group and day). **(G)** Relative delta comparing the  
1339 differences between the area under the curves resulting from GTT and ITT in HF diet fed mice  
1340 and the indicated groups of mice at days 0, 10 and 20 after NAD<sup>+</sup> treatment **(H)** Circadian  
1341 serum triglyceride content (n = 9-10 mice per time point) (left), and direct comparisons from all  
1342 measurements independently of ZT (right). **(I)** Representative hepatic histopathology. Upper  
1343 panel: Oil-red-O stain (ORO). Lower panel: Hematoxilin/Eosin. Images were acquired at 20X  
1344 optical magnification, and a detailed 100X digital magnification is shown **(J)** Bar graph

1345 represents quantification of ORO signal in arbitrary units. Signal for control mice was set to 1  
1346 (n = 3 biological and 3 technical replicates). **(K)** The length of lipid droplets was compared  
1347 between groups (n = 3 biological and 3 technical replicates) **(L)** Western blot of PPAR $\gamma$ 1, 2 and  
1348 CEBP $\alpha$  proteins in whole cell extracts from mouse liver at the indicated times of day (ZT).  
1349 GAPDH was used as loading control. **(M)** Quantification of western blots from n = 4 - 5 mice.  
1350 Measurements were normalized to GAPDH loading control, and data from CD at ZT0 was set  
1351 to 1. \*\*\* p <0.001, two-way ANOVA with Bonferroni post-test.  
1352 CD: Control diet fed mice; HF: High-fat diet fed mice; HFN: High-fat diet fed, NAD<sup>+</sup> treated  
1353 mice at ZT11; HFN23: High-fat diet fed, NAD<sup>+</sup> treated mice at ZT23. In the circadian plots,  
1354 points at ZT24 are same as ZT0, replotted to show 24-h trends Data represent mean  $\pm$  SE and  
1355 were analyzed by two-way ANOVA using Tukey posttest, except when comparing AUC or  
1356 hepatic stain, where one-way ANOVA followed by Tukey's posttest was used. \* p <0.05, \*\* p  
1357 <0.01, \*\*\* p <0.001; ns: non-significant. Symbol key for multiple comparisons: \* CD vs HF;  
1358 <sup>o</sup> CD vs HFN23; <sup>X</sup> HF vs HFN23. See also complementary Figure S5.

1359 **Figure 6. Distinct impact of NAD<sup>+</sup> treatment at ZT11 versus ZT23 on hepatic nutrient and**  
1360 **insulin sensing pathways.**

1361 **(A)** Expression of AKT, p-AKT(S473), AMPK and p-AMPK(T172) along the day in the liver  
1362 from mice treated with NAD<sup>+</sup> either at ZT11 (HFN) or at ZT23 (HFN23) was determined by  
1363 western blot. GAPDH was used as a loading control **(B)** Quantification of western blots from n  
1364 = 5 biological samples. Measurements were normalized to GAPDH loading control, and data  
1365 from CD at ZT0 was set to 1. **(C)** Expression of proteins and phosphor-proteins in the mTOR  
1366 pathway along the day in the liver from mice treated with NAD<sup>+</sup> either at ZT11 (HFN) or at

1367 ZT23 (HFN23) was assessed by western blot. **(D)** Quantification of western blots from n = 5  
1368 biological samples. Measurements were normalized to p84 or GAPDH loading controls, and  
1369 data from CD at ZT0 was set to 1. **(E-G)** RT-qPCR determined gene expression of rate-limiting  
1370 and regulatory enzymes involved in mitochondrial (E) or peroxisomal (F)  $\beta$ -oxidation, and (G)  
1371  $\omega$ -oxidation (n = 5 - 6 mice per data point).

1372 CD: Control diet fed mice; HF: High-fat diet fed mice; HFN: High-fat diet fed, NAD<sup>+</sup> treated  
1373 mice at ZT11; HFN23: High-fat diet fed, NAD<sup>+</sup> treated mice at ZT23. Data points at ZT24 are  
1374 duplicates from ZT0, replotted to show 24-h trends. The data represent means  $\pm$  SE. \*p < 0.05,  
1375 \*\*p < 0.01, \*\*\*p < 0.001, Two-way ANOVA followed by Bonferroni's (B,D) or Tukey's (E-G)  
1376 posttest. Symbol key for multiple comparisons: \* HFN vs HFN23; # HF vs HFN. See also  
1377 complementary Figure S6.

### 1378 **Figure 7. NAD<sup>+</sup> resets the hepatic circadian clock**

1379 **(A)** Circadian clock protein expression from liver whole cell extracts of obese mice treated with  
1380 NAD<sup>+</sup> at ZT11 (HFN) or ZT23 (HFN23). Tubulin or GAPDH were used as loading control. **(B)**  
1381 Quantification of western blots from n = 4 – 5 mice. Measurements were normalized to the  
1382 loading control, and data from CD at ZT0 was set to 1 (n = 5 biological samples per data point)  
1383 **(C)** RT-qPCR determined circadian clock gene expression in the liver (n = 5 - 6 biological  
1384 replicates per data point) **(D)** RT-qPCR determined rhythmic expression of clock-controlled  
1385 genes in the liver (n = 5 - 6 biological replicates per data point). **(E, F)** Chromatin  
1386 immunoprecipitation (ChIP qPCR) was performed in the liver from mice at ZT6 or ZT18, using  
1387 anti-BMAL1 antibodies. (n= 4 biological and two technical replicates). **(G, H)** RT-qPCR  
1388 determined rhythmic expression of genes related to NAD<sup>+</sup> metabolism **(G)** and genes  
1389 regulating lipid metabolism **(H)** in the liver (n=5-6 mice per data point). BMAL1 ChIPs at ZT6 or

1390 ZT18 were analyzed by performing qPCR on BMAL1 binding sites at selected regulatory  
1391 elements of these genes.

1392 CD: Control diet fed mice; HF: High-fat diet fed mice; HFN: High-fat diet fed, NAD<sup>+</sup> treated  
1393 mice at ZT11; HFN23: High-fat diet fed, NAD<sup>+</sup> treated mice at ZT23. (B-D) Data points at ZT24  
1394 are duplicates from ZT0, replotted to show 24-h trends. The data represent means  $\pm$  SE. \* $p$  <  
1395 0.05, \*\* $p$  < 0.01, \*\*\* $p$  < 0.001, Two-way ANOVA followed by Tukey's posttest. See also  
1396 complementary Figure S7.

1397 **Figure 8. Time-of-day dictates efficiency of NAD<sup>+</sup> treatment of diet-induced metabolic**  
1398 **disease through resetting the hepatic circadian clock and adjusting coordination**  
1399 **between intracellular signaling and gene expression.**

1400 **(A)** RT-qPCR from clock genes in the SCN at ZT0 and ZT12 (n=3 biological replicates and 2  
1401 technical replicates). **(B)** Representative double plotted actograms of locomotion measured  
1402 using infrared sensors in a 12- hour light/12-hour dark cycle. **(C)** Average 24-hour activity  
1403 profile from the indicated groups of mice. Average was calculated for five days after NAD<sup>+</sup>  
1404 treatment. n= 6-7 mice. **(D)** Food intake was measured over 24 hours **(E)** Average food intake  
1405 during light phase (day) and dark phase (night). **(F)** NAD<sup>+</sup> bioavailability at a specific time of  
1406 day resets the hepatic molecular clock. At ZT12, NAD<sup>+</sup> sustains the alignment of the hepatic  
1407 molecular clock while reinforcing circadian oscillation in the activity of nutritional sensors such  
1408 as AMPK, AKT or mTOR. Transcriptional responses are adjusted accordingly to suppress  
1409 inflammation probably through inhibition of NF- $\kappa$ B transcription factor, and to increase  
1410 amplitude in lipolytic gene expression with a peak during the active phase. Membrane  
1411 trafficking and ULK activity are indicative of active autophagy as a specific response to NAD<sup>+</sup>  
1412 treatment. At ZT0, increased NAD<sup>+</sup> in the liver resets the phase of the molecular clock,

1413 imposing antiphase rhythms in clock gene and protein expression. This in turn inverts the  
1414 phase of clock-controlled genes and uncouples transcriptional responses.

1415 CD: Control diet fed mice; HF: High-fat diet fed mice; HFN: High-fat diet fed, NAD<sup>+</sup> treated  
1416 mice at ZT11; HFN23: High-fat diet fed, NAD<sup>+</sup> treated mice at ZT23. (B-D) Data points at ZT24  
1417 are duplicates from ZT0, replotted to show 24-h trends. The data represent means  $\pm$  SE. \* $p <$   
1418 0.05, \*\* $p <$  0.01, \*\*\* $p <$  0.001, Two-way RM ANOVA followed by Sidak's posttest. Symbol key  
1419 for multiple comparisons: # HF vs HFN, X HF vs HFN23, \$ HFN vs HFN23. See also  
1420 complementary Figure S7.

1421



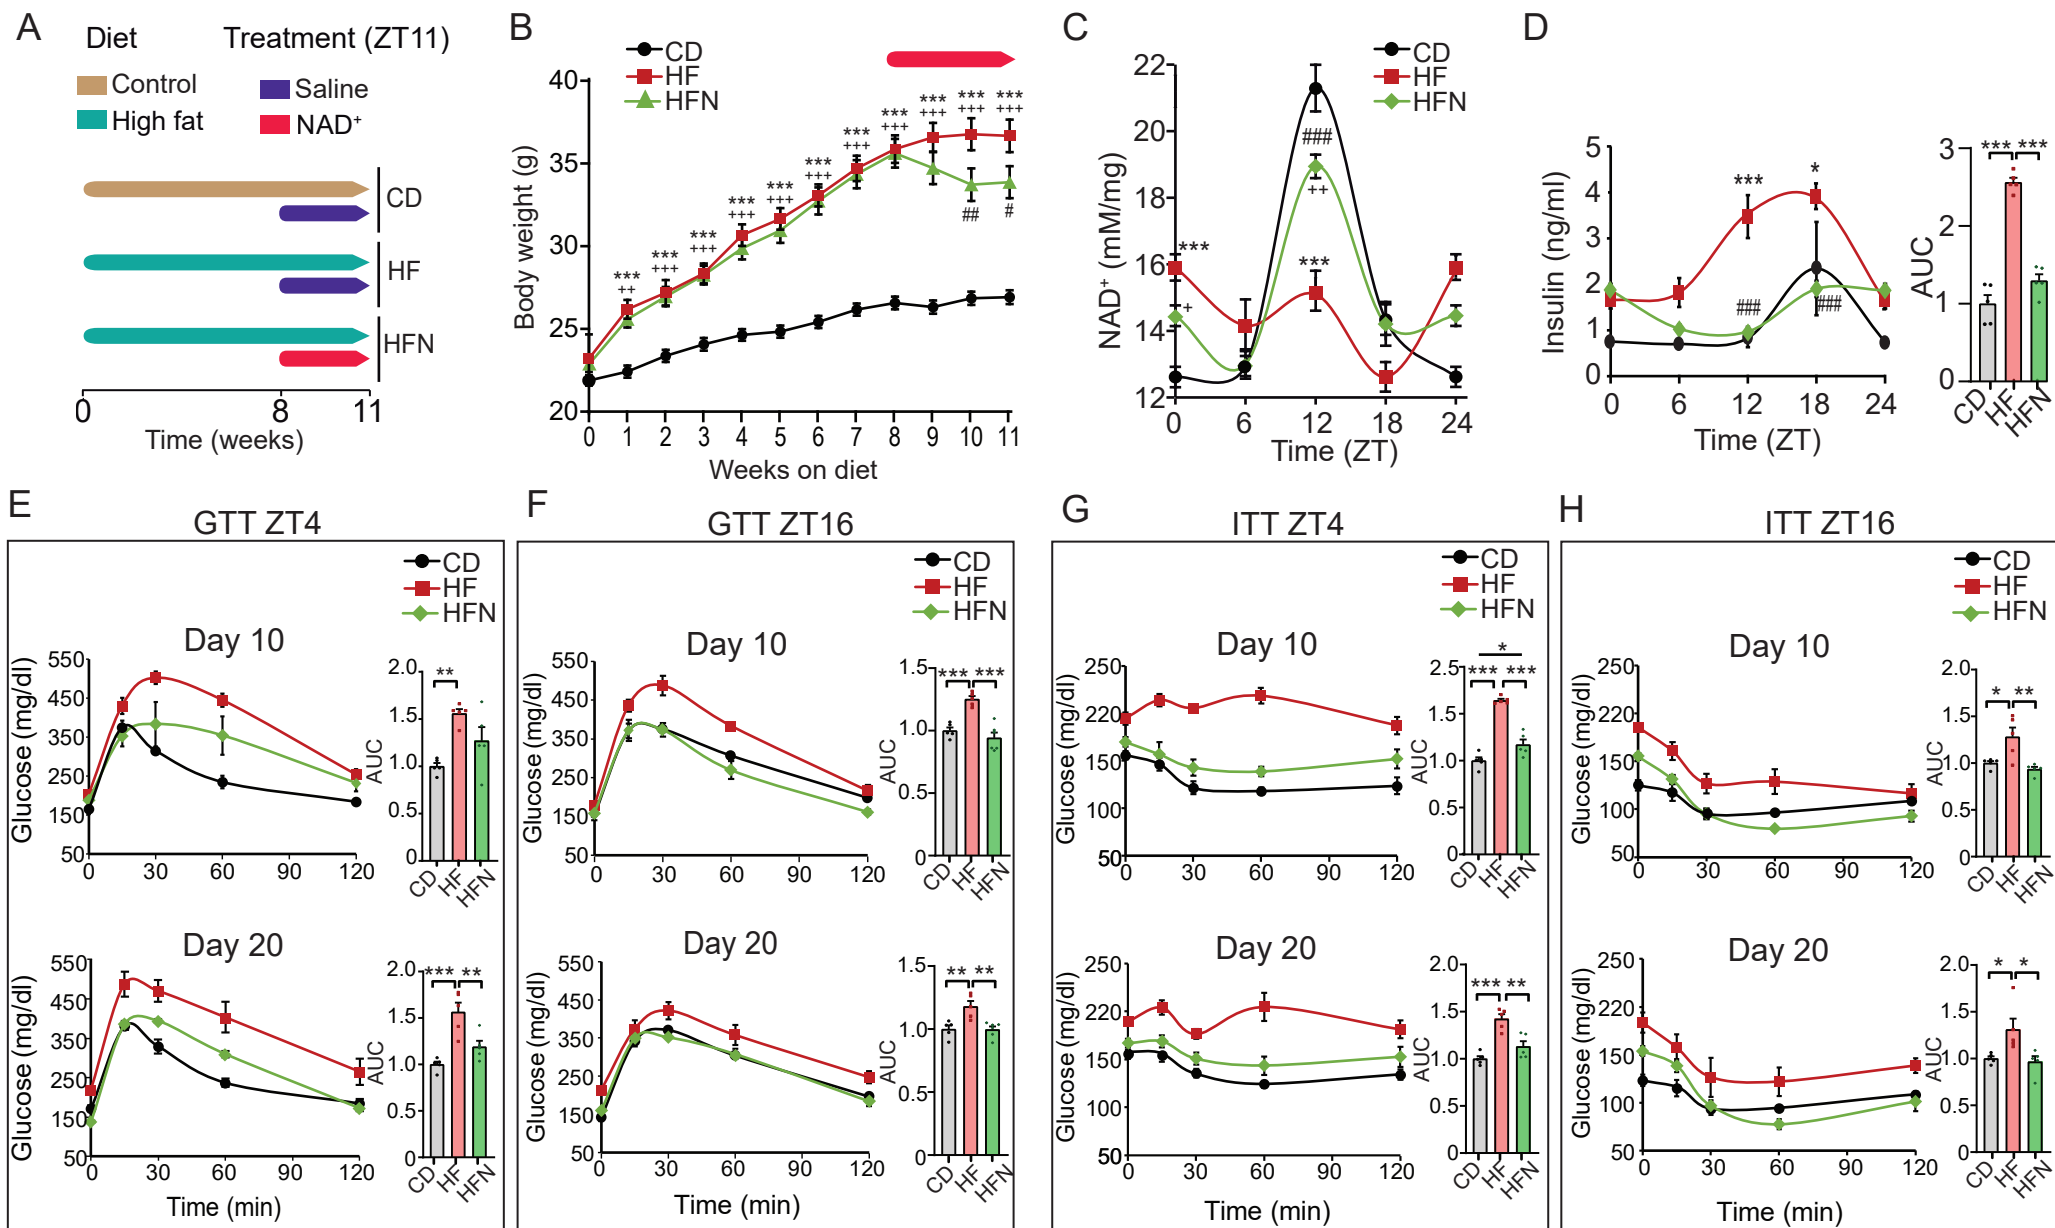

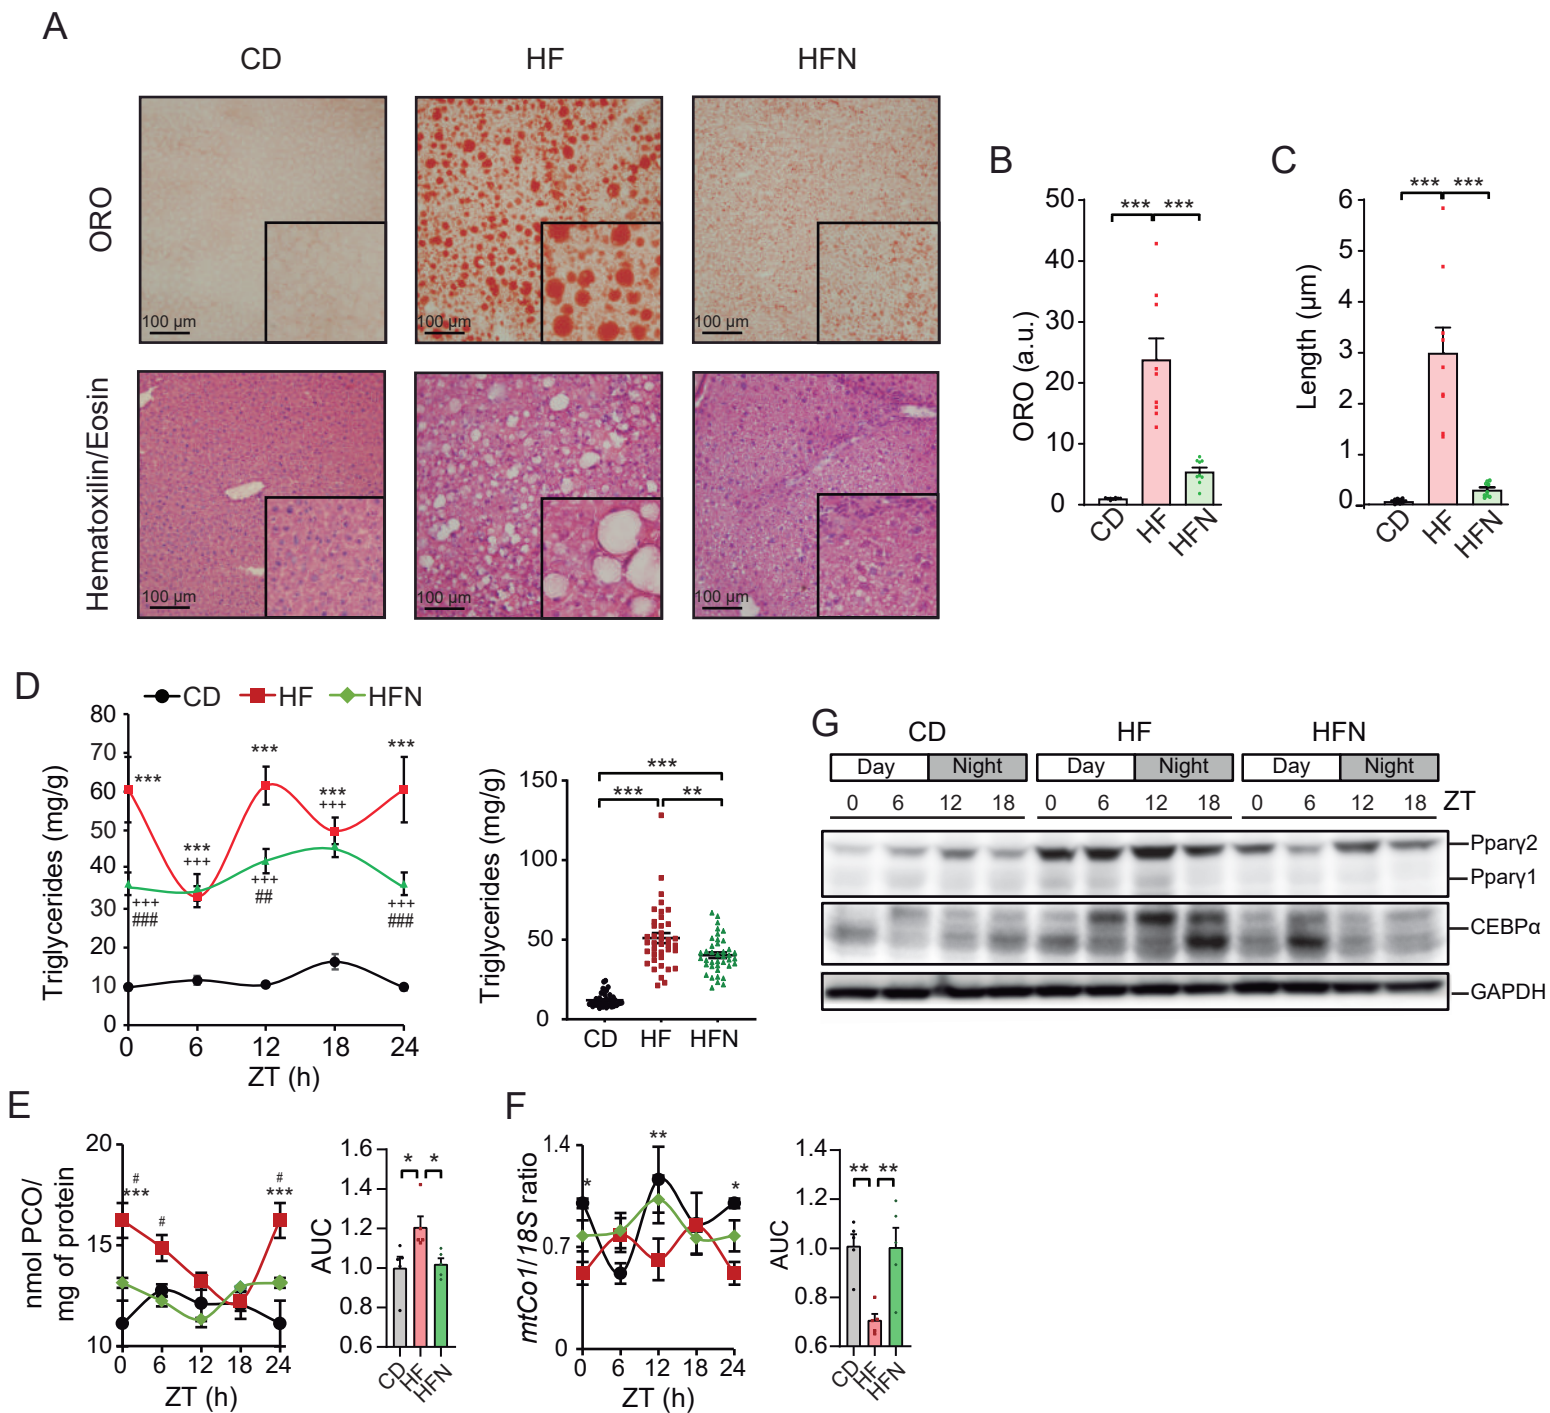

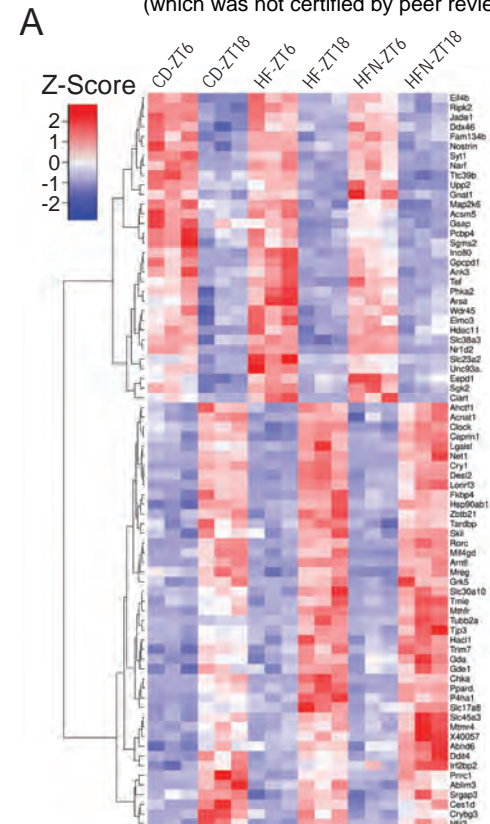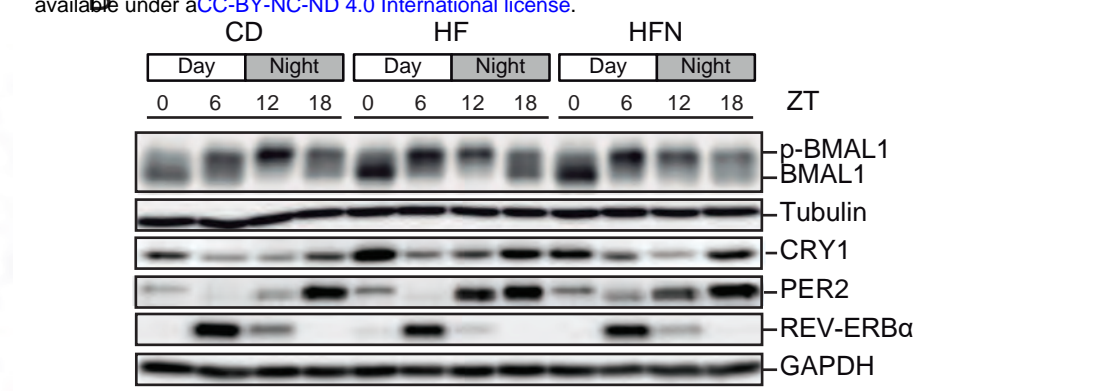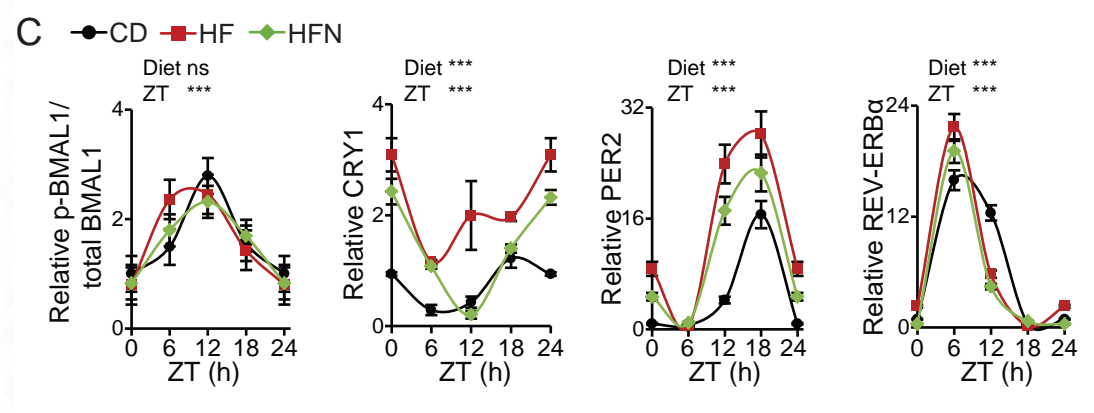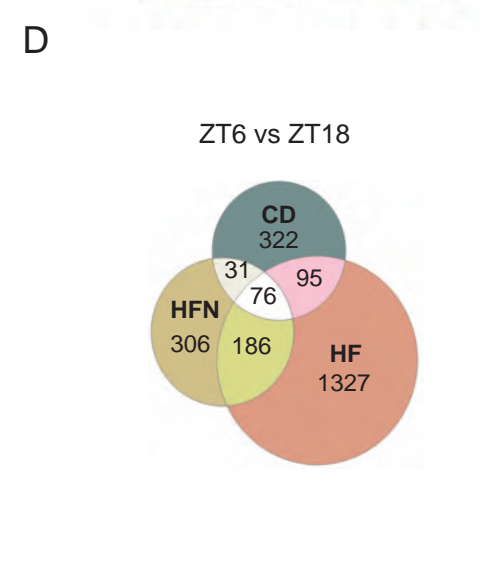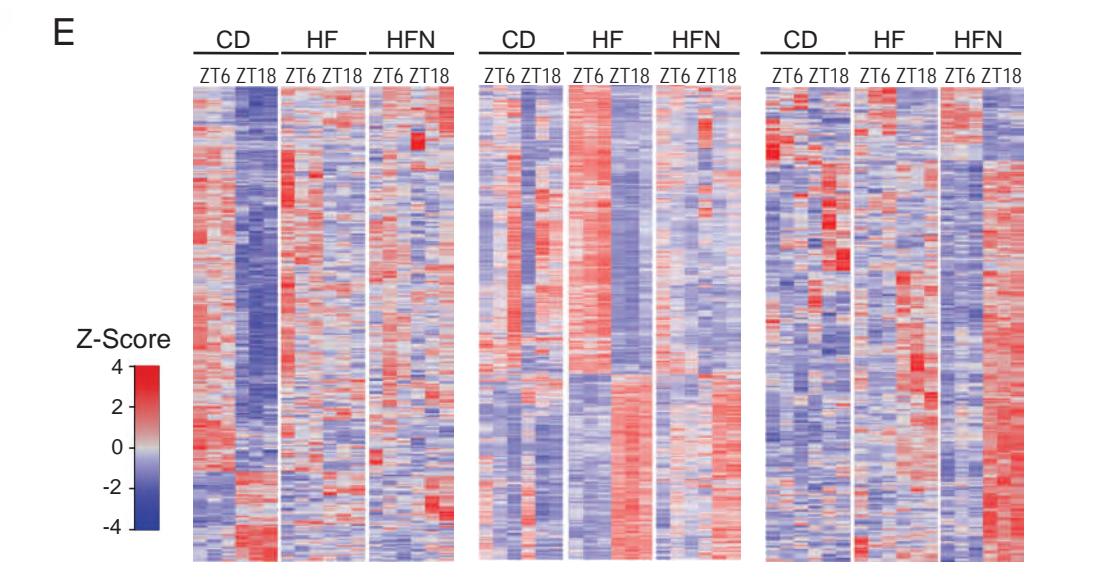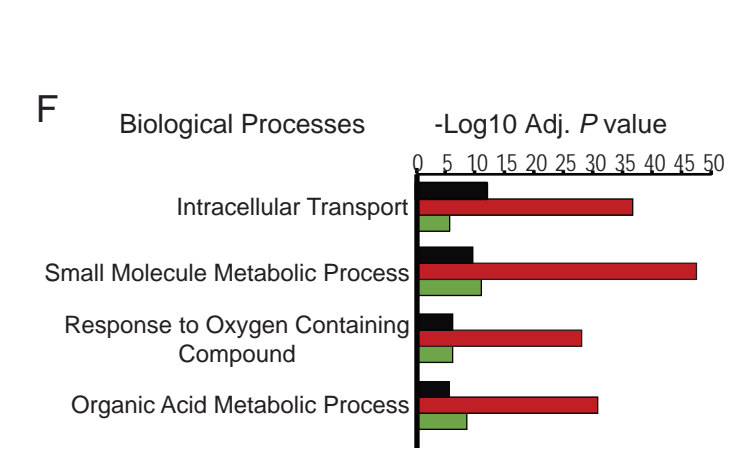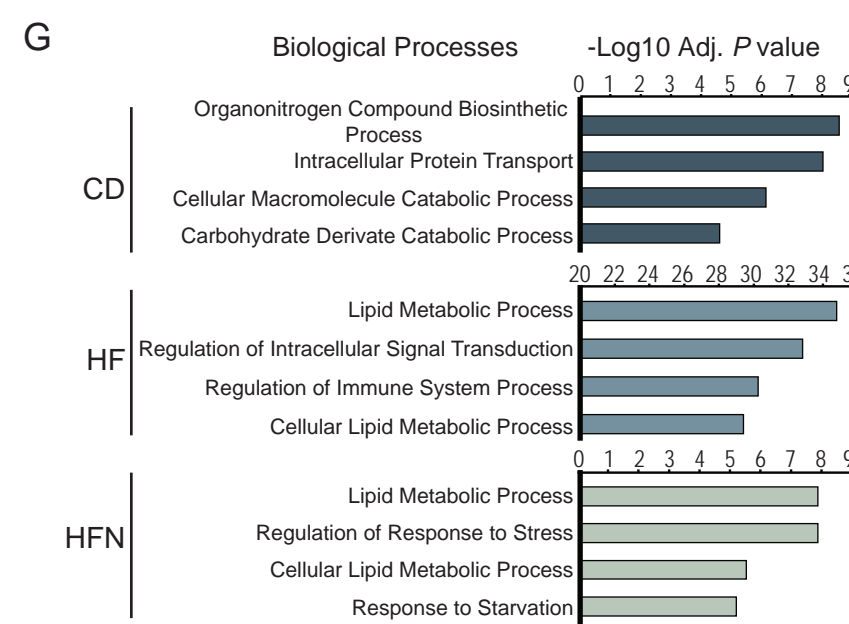

A

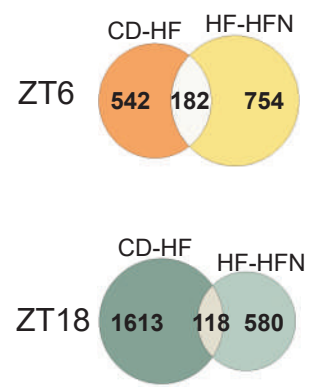

B

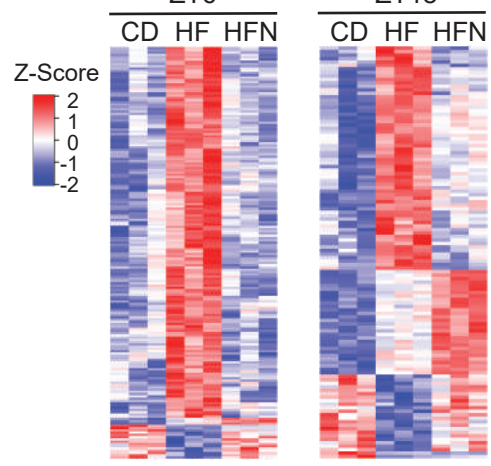

C

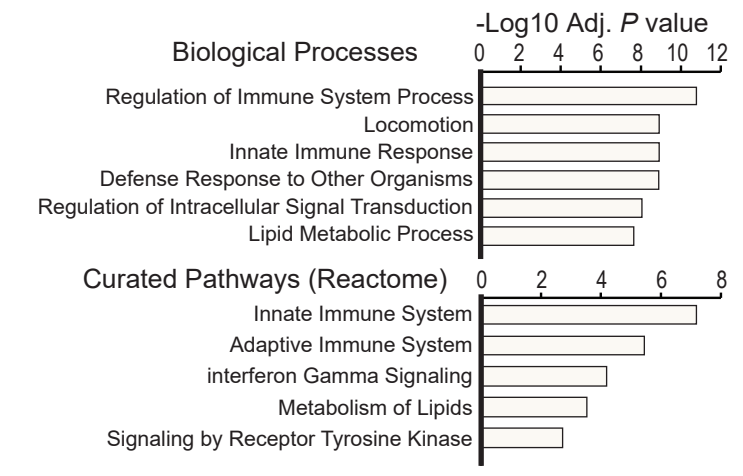

D

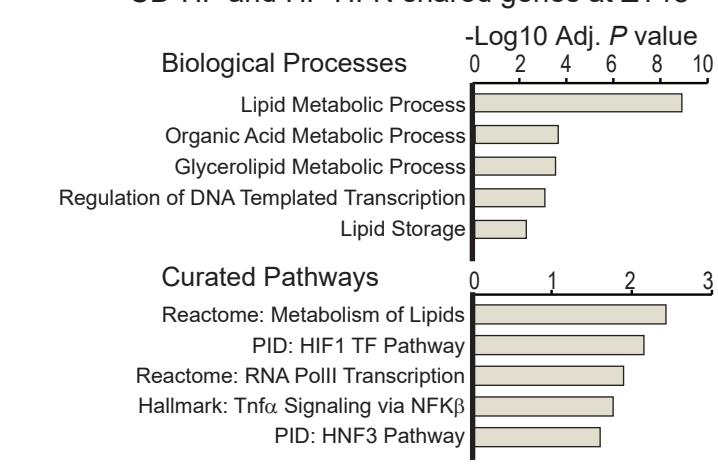

E

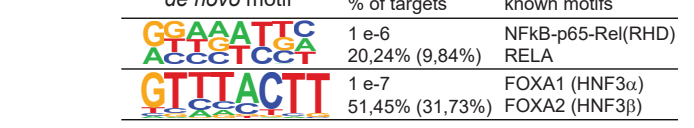

H

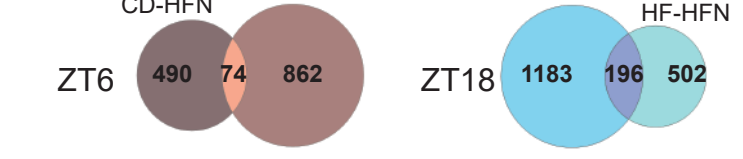

I

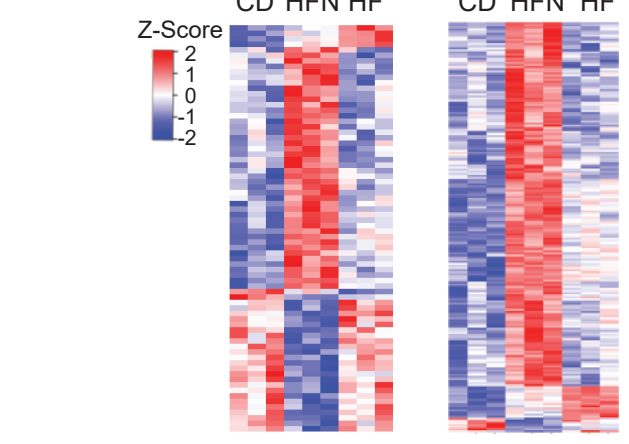

F

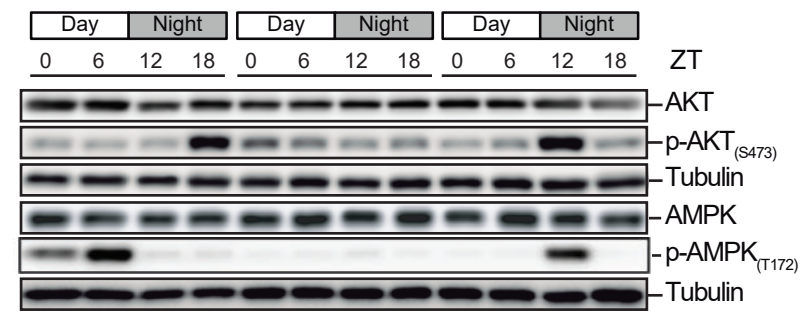

G

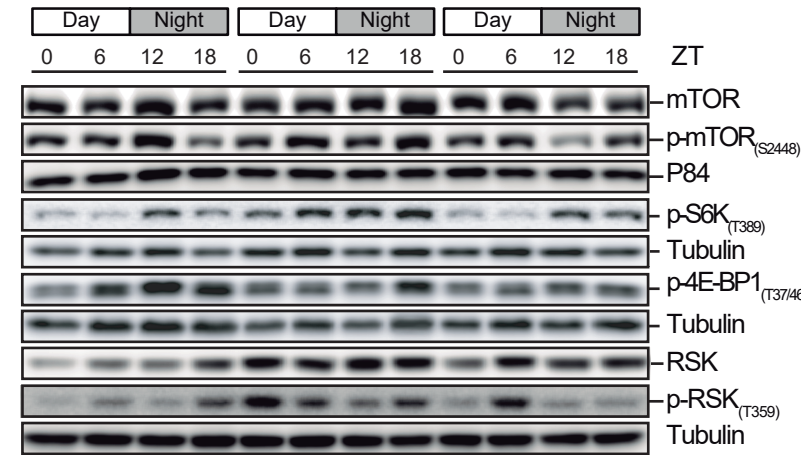

J

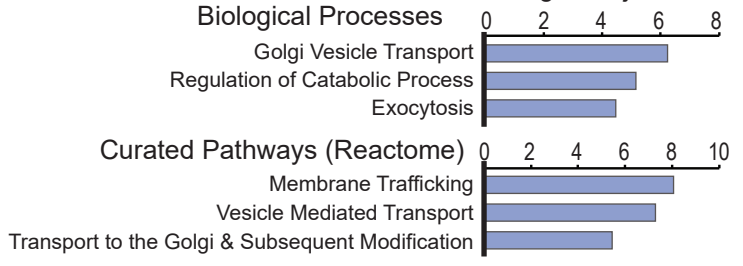

K

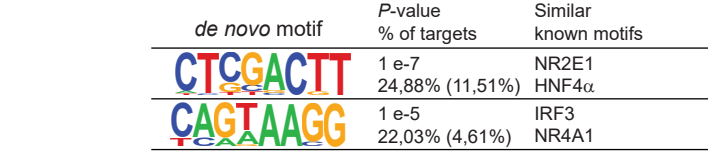

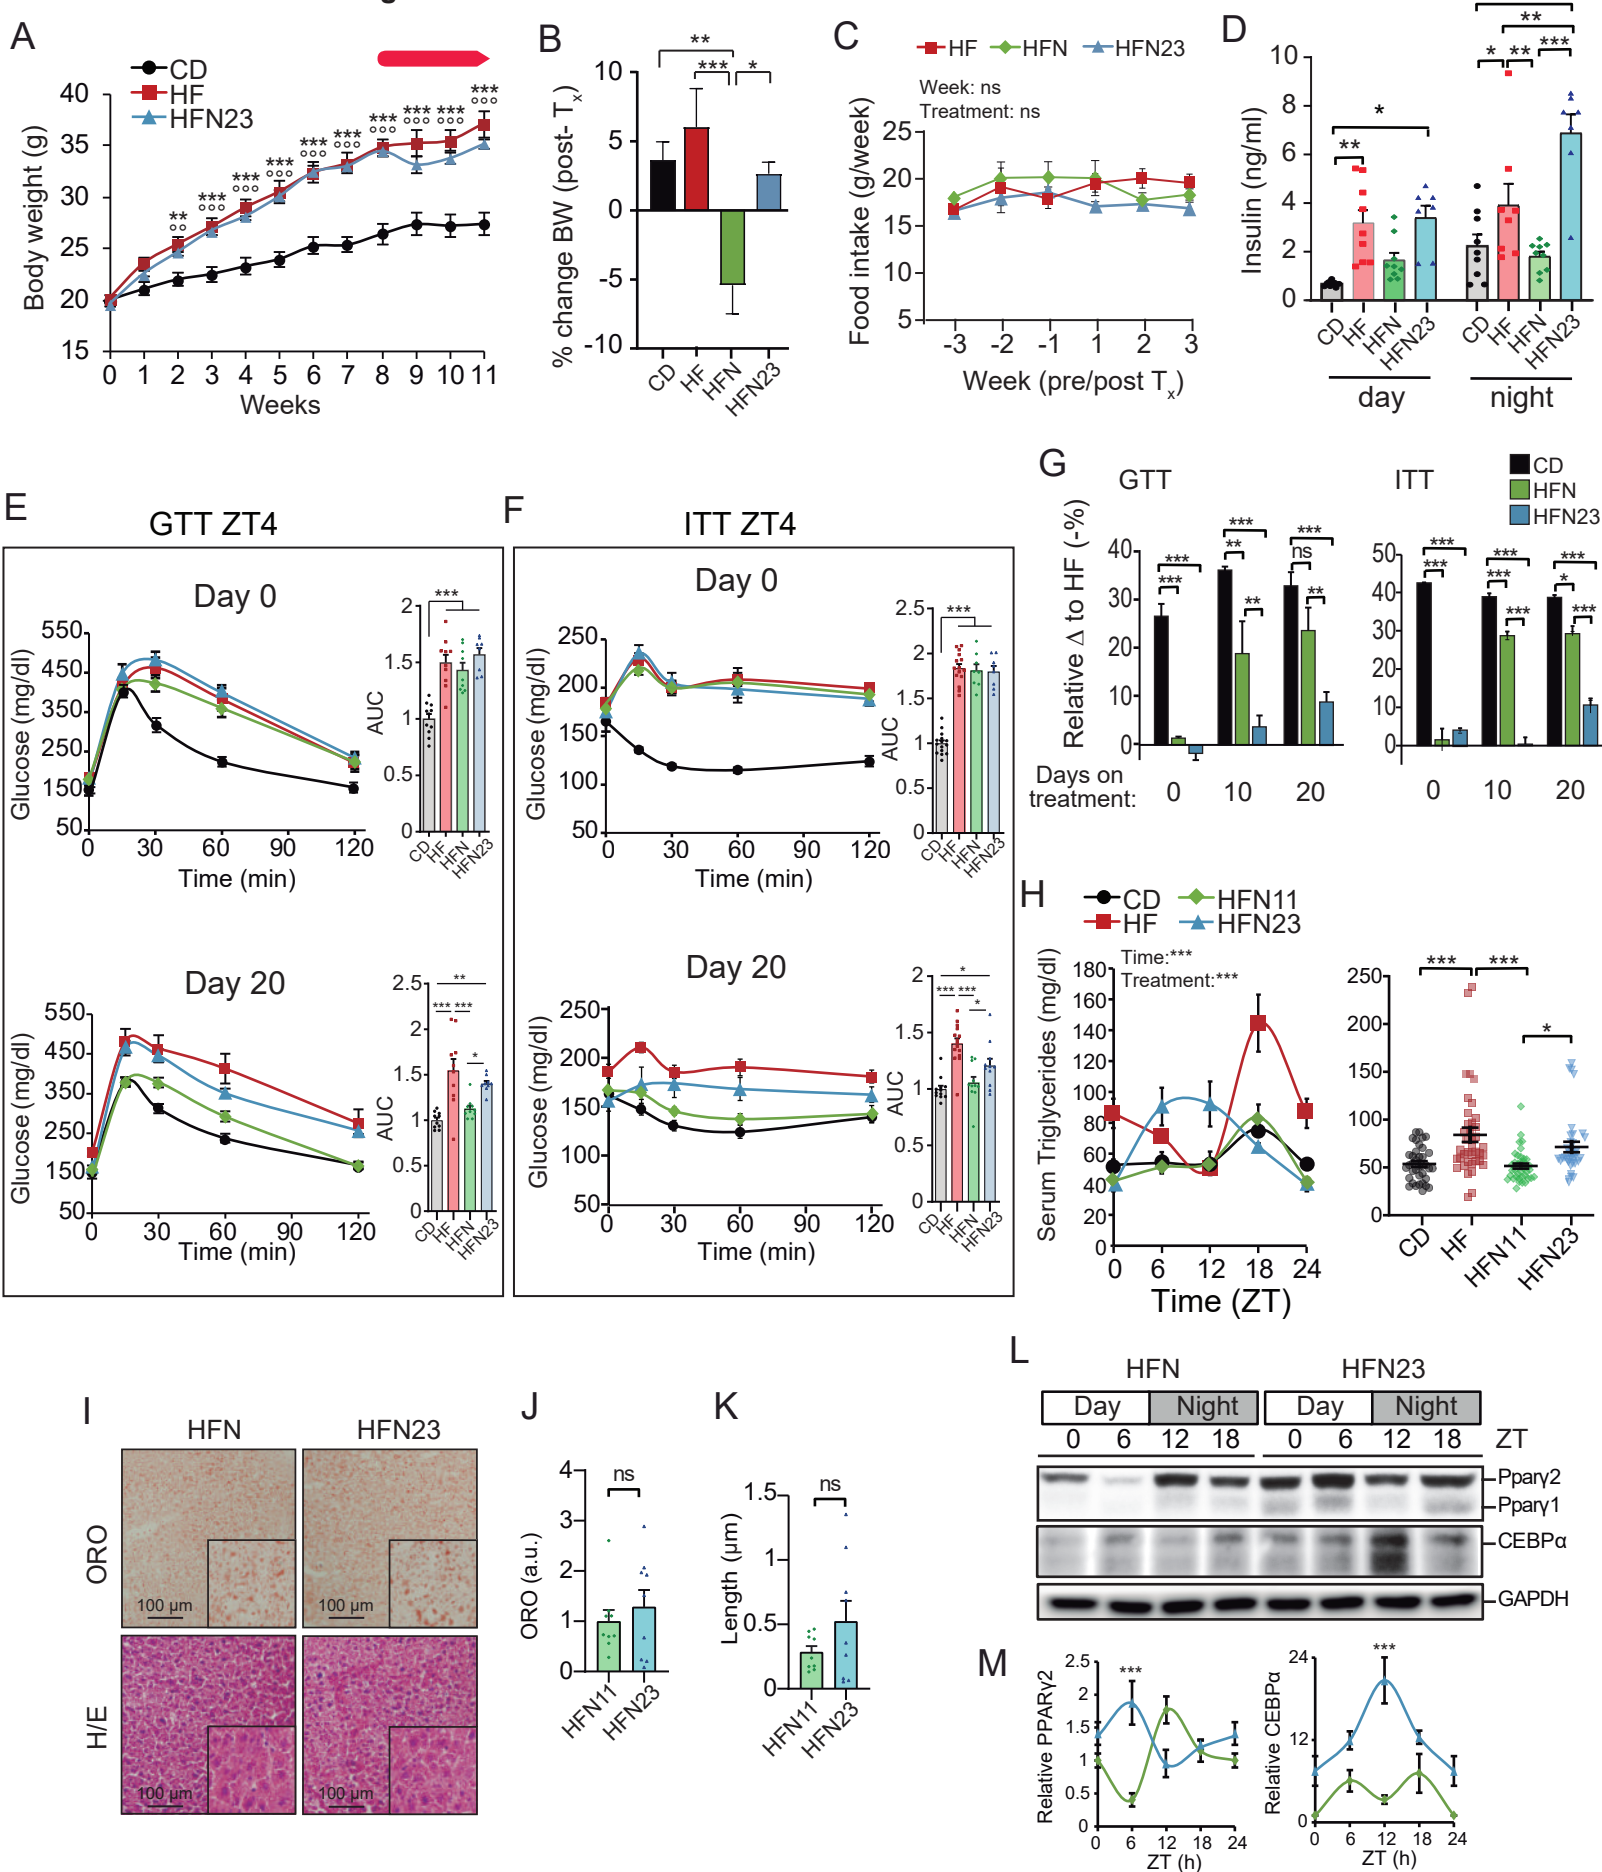

**A**

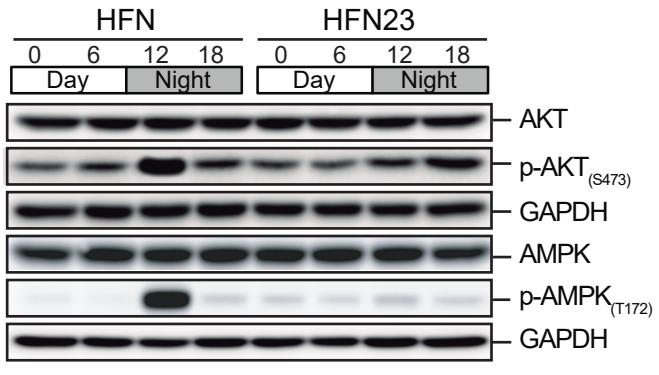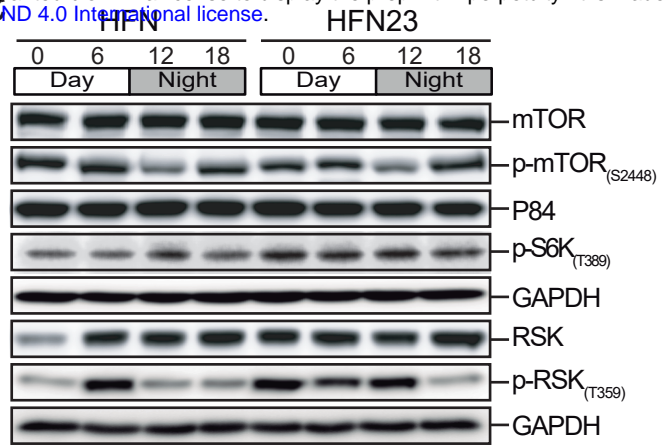

**B**

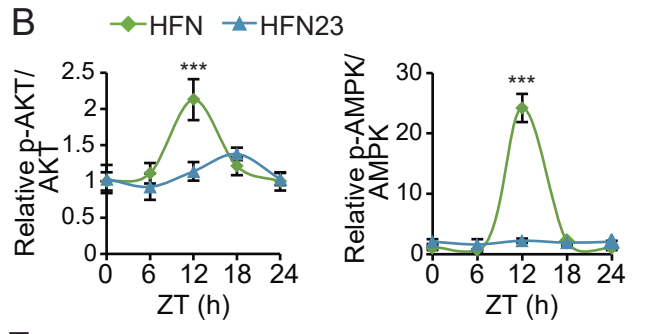

**D**

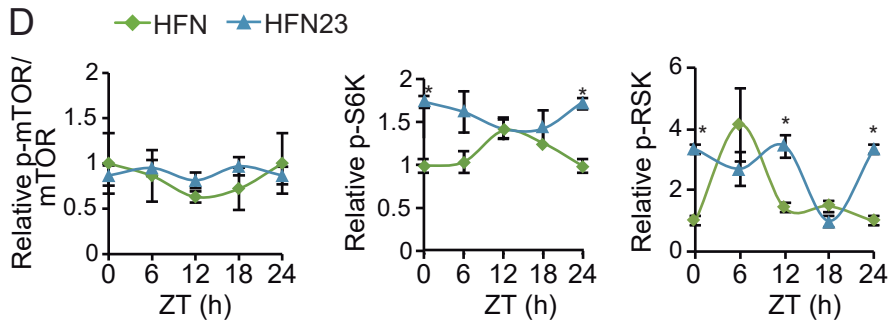

**E**

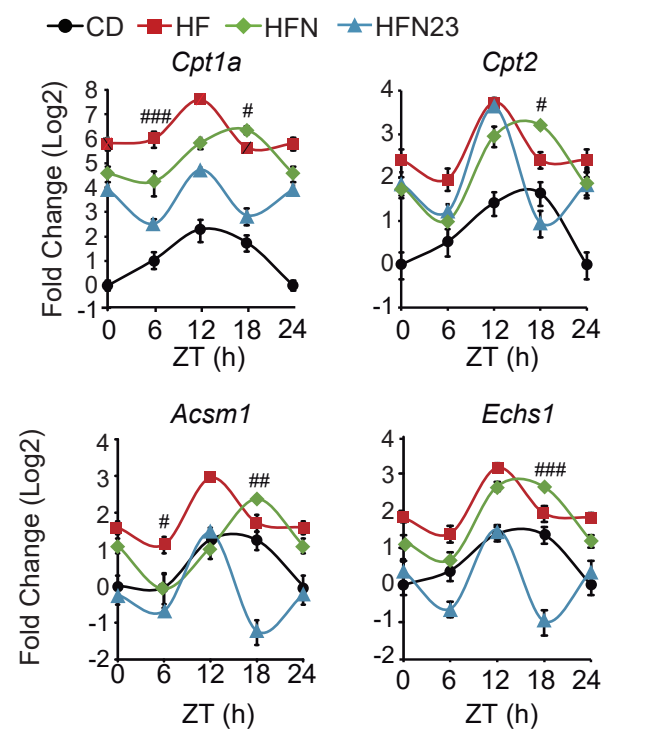

**F**

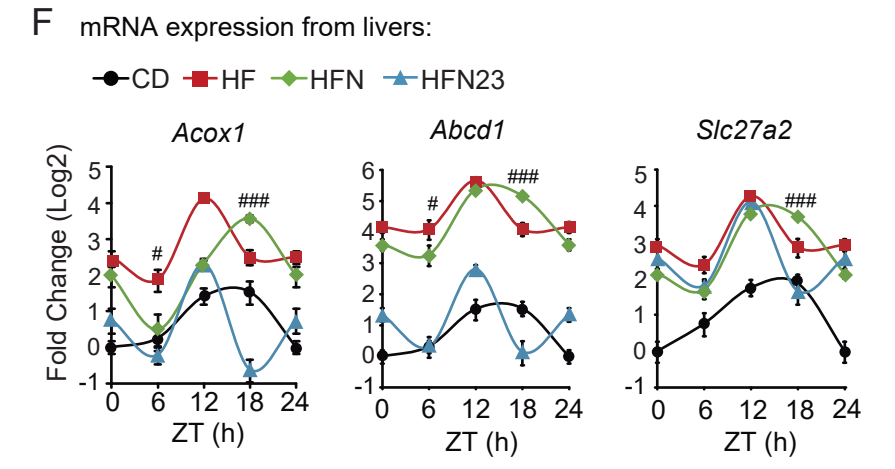

**G**

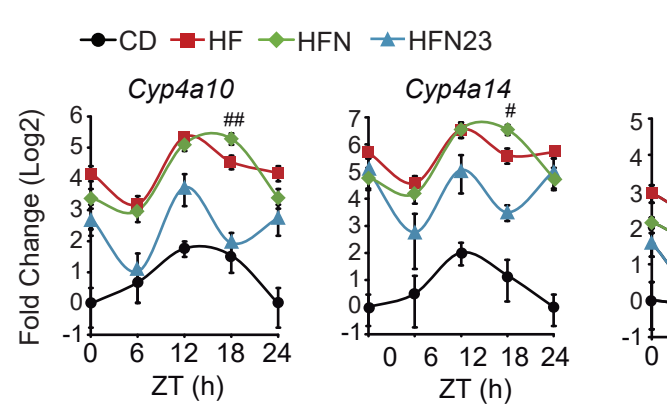

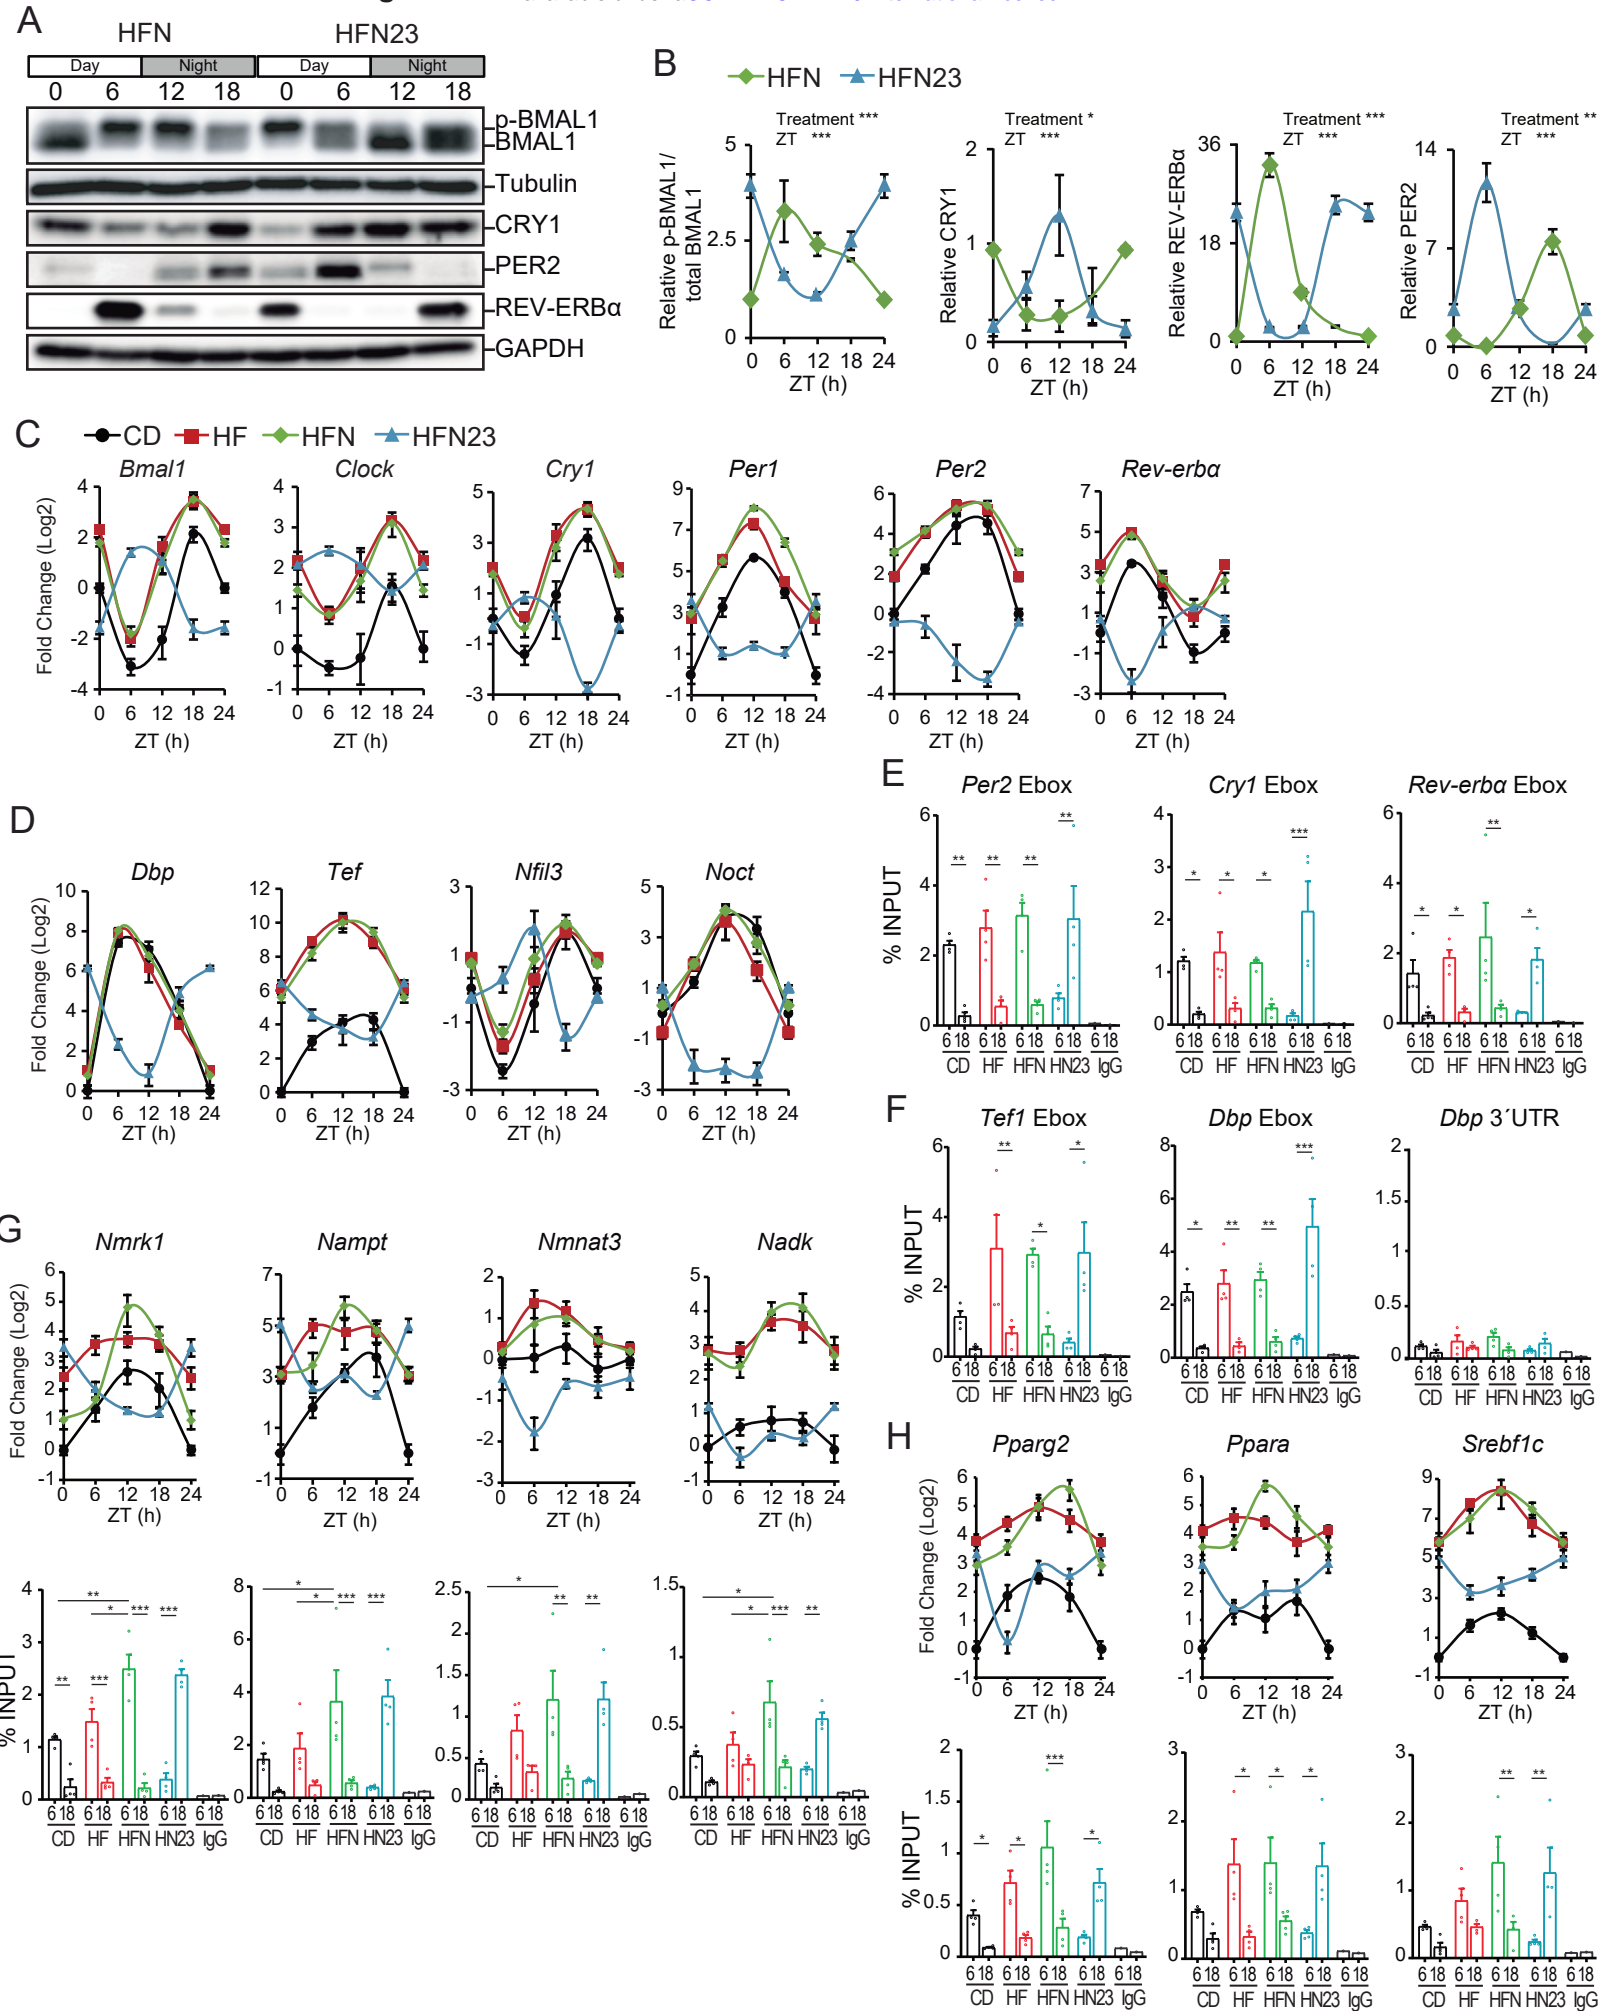

**A** mRNA expression from SCN: ■ HF ■ HFN ■ HFN23

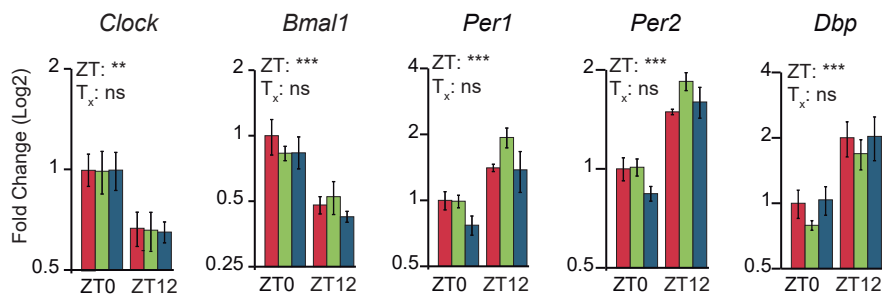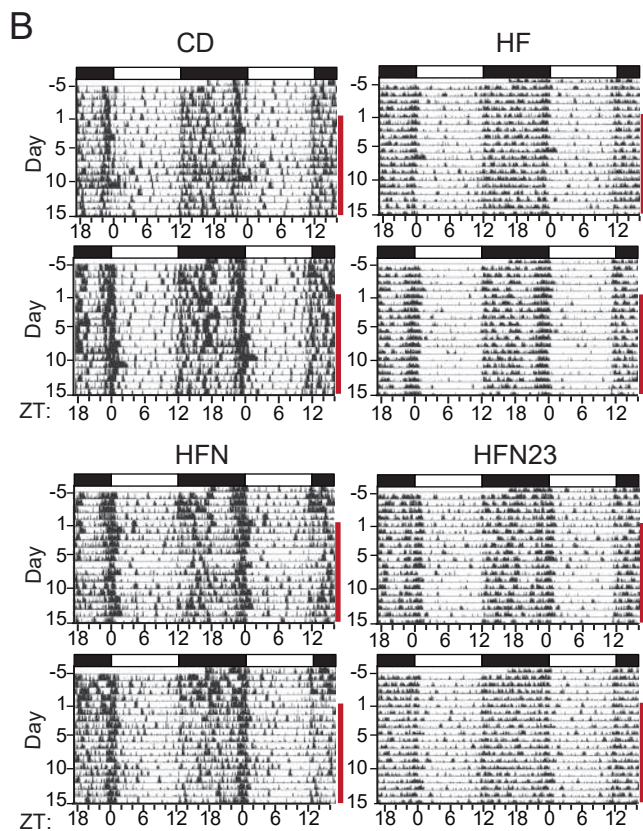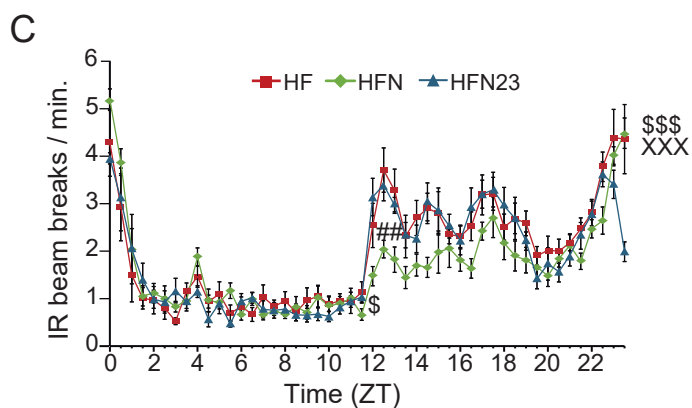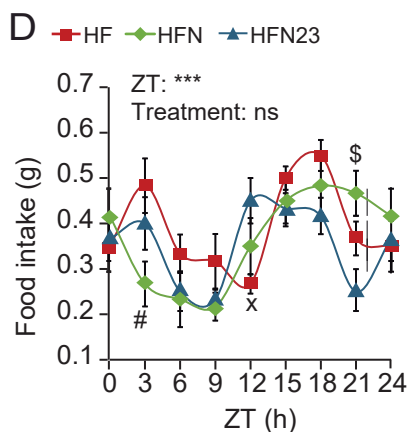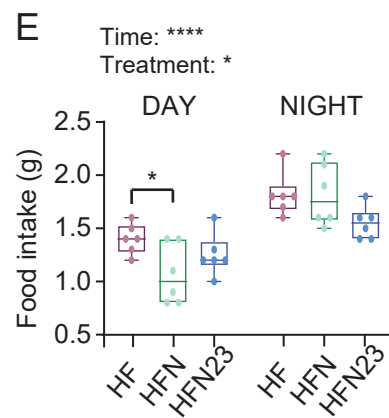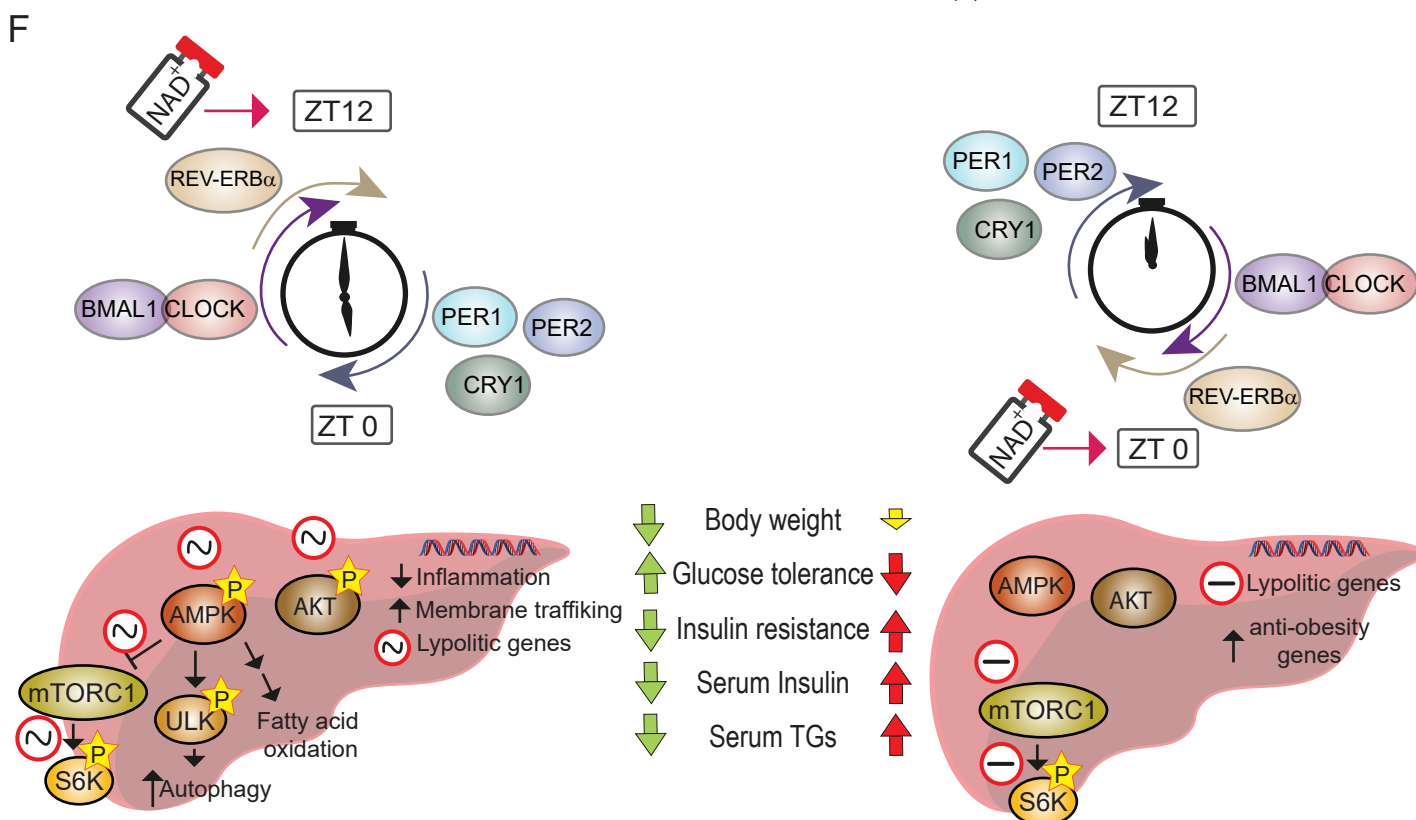

Source: https://www.biorxiv.org/content/10.1101/2022.08.12.503453v1.full.pdf
